# Supplementary material for: Seroprevalence of anti-SARS-CoV-2 antibodies after the first wave of the COVID-19 pandemic in a vulnerable population in France: a cross-sectional study
Source: PubMed Central journal article supplement — BMJ Open. 2021 Nov 23;11(11):e053201. doi: 10.1136/bmjopen-2021-053201 (PMC8611237; doi:10.1136/bmjopen-2021-053201), 2021-11-23
Supplement: bmjopen-2021-053201.draft_revisions.pdf [file bmjopen-2021-053201.draft_revisions.pdf]

# BMJ Open

BMJ Open is committed to open peer review. As part of this commitment we make the peer review history of every article we publish publicly available.

When an article is published we post the peer reviewers' comments and the authors' responses online. We also post the versions of the paper that were used during peer review. These are the versions that the peer review comments apply to.

The versions of the paper that follow are the versions that were submitted during the peer review process. They are not the versions of record or the final published versions. They should not be cited or distributed as the published version of this manuscript.

BMJ Open is an open access journal and the full, final, typeset and author-corrected version of record of the manuscript is available on our site with no access controls, subscription charges or pay-per-view fees (<http://bmjopen.bmj.com>).

If you have any questions on BMJ Open's open peer review process please email [info.bmjopen@bmj.com](mailto:info.bmjopen@bmj.com)

# BMJ Open

## High seroprevalence of anti-SARS-CoV-2 antibodies after the first wave of the COVID-19 pandemic in a vulnerable population in France: a cross-sectional study

|                               |                                                                                                                                                                                                                                                                                                                                                                                                                                                                                                                                                                                                                                                                                                                                                                                                                                                                                                                                                                                                                                                                                                                                  |
|-------------------------------|----------------------------------------------------------------------------------------------------------------------------------------------------------------------------------------------------------------------------------------------------------------------------------------------------------------------------------------------------------------------------------------------------------------------------------------------------------------------------------------------------------------------------------------------------------------------------------------------------------------------------------------------------------------------------------------------------------------------------------------------------------------------------------------------------------------------------------------------------------------------------------------------------------------------------------------------------------------------------------------------------------------------------------------------------------------------------------------------------------------------------------|
| Journal:                      | <i>BMJ Open</i>                                                                                                                                                                                                                                                                                                                                                                                                                                                                                                                                                                                                                                                                                                                                                                                                                                                                                                                                                                                                                                                                                                                  |
| Manuscript ID                 | bmjopen-2021-053201                                                                                                                                                                                                                                                                                                                                                                                                                                                                                                                                                                                                                                                                                                                                                                                                                                                                                                                                                                                                                                                                                                              |
| Article Type:                 | Original research                                                                                                                                                                                                                                                                                                                                                                                                                                                                                                                                                                                                                                                                                                                                                                                                                                                                                                                                                                                                                                                                                                                |
| Date Submitted by the Author: | 12-May-2021                                                                                                                                                                                                                                                                                                                                                                                                                                                                                                                                                                                                                                                                                                                                                                                                                                                                                                                                                                                                                                                                                                                      |
| Complete List of Authors:     | <p>Beaumont, Adeline; Santé publique France, the national public health agency</p> <p>Durand, Cécile; Santé publique France, the national public health agency</p> <p>Ledrans, Martine; Santé publique France, the national public health agency</p> <p>Schwoebel, Valérie; Santé publique France, the national public health agency</p> <p>Noel, Harold; Santé publique France, the national public health agency</p> <p>Le Strat, Yann; Santé publique France, the national public health agency</p> <p>Diulus, Donatien; Agence Régionale de Santé Occitanie, Délégation départementale des Pyrénées-Orientales</p> <p>Colombain, Léa; Centre Hospitalier de Perpignan, Service des Maladies Infectieuses et Tropicales</p> <p>Médus, Marie; Centre Hospitalier de Perpignan, Service des Maladies Infectieuses et Tropicales</p> <p>Gueudet, Philippe; Centre Hospitalier de Perpignan, Laboratoire de biochimie et de biologie</p> <p>Mouly, Damien; Santé publique France, the national public health agency</p> <p>Aumaître, Hugues; Centre Hospitalier de Perpignan, Service des Maladies Infectieuses et Tropicales</p> |
| Keywords:                     | COVID-19, PUBLIC HEALTH, Epidemiology < INFECTIOUS DISEASES                                                                                                                                                                                                                                                                                                                                                                                                                                                                                                                                                                                                                                                                                                                                                                                                                                                                                                                                                                                                                                                                      |
|                               |                                                                                                                                                                                                                                                                                                                                                                                                                                                                                                                                                                                                                                                                                                                                                                                                                                                                                                                                                                                                                                                                                                                                  |

SCHOLARONE™  
Manuscripts

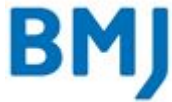

I, the Submitting Author has the right to grant and does grant on behalf of all authors of the Work (as defined in the below author licence), an exclusive licence and/or a non-exclusive licence for contributions from authors who are: i) UK Crown employees; ii) where BMJ has agreed a CC-BY licence shall apply, and/or iii) in accordance with the terms applicable for US Federal Government officers or employees acting as part of their official duties; on a worldwide, perpetual, irrevocable, royalty-free basis to BMJ Publishing Group Ltd ("BMJ") its licensees and where the relevant Journal is co-owned by BMJ to the co-owners of the Journal, to publish the Work in this journal and any other BMJ products and to exploit all rights, as set out in our [licence](#).

The Submitting Author accepts and understands that any supply made under these terms is made by BMJ to the Submitting Author unless you are acting as an employee on behalf of your employer or a postgraduate student of an affiliated institution which is paying any applicable article publishing charge ("APC") for Open Access articles. Where the Submitting Author wishes to make the Work available on an Open Access basis (and intends to pay the relevant APC), the terms of reuse of such Open Access shall be governed by a Creative Commons licence – details of these licences and which [Creative Commons](#) licence will apply to this Work are set out in our licence referred to above.

Other than as permitted in any relevant BMJ Author's Self Archiving Policies, I confirm this Work has not been accepted for publication elsewhere, is not being considered for publication elsewhere and does not duplicate material already published. I confirm all authors consent to publication of this Work and authorise the granting of this licence.

1  
2  
3  
4  
5  
6  
7  
8  
9  
10

## **Title: High seroprevalence of anti-SARS-CoV-2 antibodies after the first wave of the COVID-19 pandemic in a vulnerable population in France: a cross-sectional study**

11 Authors: Adeline Beaumont<sup>1</sup>, Cécile Durand<sup>1</sup>, Martine Ledrans<sup>1</sup>, Valérie Schwoebel<sup>1</sup>, Harold Noel<sup>1</sup>,  
12 Yann Le Strat<sup>1</sup>, Donatien Diulius<sup>2</sup>, Léa Colombain<sup>3</sup>, Marie Médus<sup>3</sup>, Philippe Gueudet<sup>4</sup>, Damien Mouly<sup>1</sup>,  
13 Hugues Aumaître<sup>3</sup>  
14

15  
16  
17 <sup>1</sup> Santé publique France, the national public health agency, Saint-Maurice, France

18 <sup>2</sup> Agence Régionale de Santé (ARS) Occitanie, Délégation départementale des Pyrénées-Orientales,  
19 Perpignan, France

20 <sup>3</sup> Centre Hospitalier de Perpignan, Service des Maladies Infectieuses et Tropicales, Perpignan, France

21 <sup>4</sup> Centre Hospitalier de Perpignan, Laboratoire de biochimie et de biologie, Perpignan, France  
22

23  
24  
25  
26 Correspondence to Damien Mouly, Santé publique France, the national public health agency, Saint-  
27 Maurice, France; damien.mouly@santepubliquefrance.fr  
28

29  
30 Word count: 3,388 words  
31  
32  
33  
34  
35  
36  
37  
38  
39  
40  
41  
42  
43  
44  
45  
46  
47  
48  
49  
50  
51  
52  
53  
54  
55  
56  
57  
58  
59  
60

## ABSTRACT

### Background

In March 2020, many cases of COVID-19 were reported in three socially deprived neighbourhoods of the city of Perpignan, in the south of France, where large sedentary gypsy communities live. A study to measure seroprevalence was conducted in July 2020 to assess the level of contamination in these neighbourhoods after the first wave of the pandemic, and to identify factors associated with seropositivity.

### Methods

S-CoPe is a cross-sectional survey conducted in selected persons aged six years old and over living in three neighbourhoods in Perpignan. Households were selected by systematic sampling and participants by random sampling. Collected blood samples were tested for SARS-CoV-2 IgG and IgM antibodies using the Elecsys® immunoassay to target the coronavirus's spike protein. Antibody seroprevalence was estimated from weighted data and associated factors were investigated using multivariate logistic regression.

### Results

The seroprevalence of anti-SARS-CoV-2 antibodies was 35.4% (95% CI: 30.2-41.0). Over a fifth of seropositive individuals (21.7% ([14.1-31.8])) did not report any COVID-19 symptom. People aged 15-64 years old were at greater risk of seropositivity than those aged 65 years or over. Obesity prevalence was 40.7% (35.8-45.8) and obese people were more likely to be seropositive (aOR=2.0 [1.1-3.8]). The risk of being seropositive was higher in households with clinical COVID-19 cases (One case: aOR=2.5 [1.3-5.0]). In the neighbourhood with the highest measured seroprevalence, people living in a dwelling with 1-2 rooms had a higher risk of being seropositive than those living in a 4-room house (aOR=2.8 [1.2-6.3]). Working during the lockdown was associated with a lower risk of seropositivity (aOR=0.2 [0.03-1.0]).

### Conclusion

Transmission prevalence of the SARS-COV-2 virus in this vulnerable population was very high during the COVID-19 pandemic's first wave. Our results highlight the need to strengthen and adapt preventive measures by taking into account all social determinants of health, especially housing conditions.

## Strengths and limitations of this study

- This seroprevalence study provides an analysis of inequalities in the risk of SARS-CoV-2 infection in a socially deprived population living in three neighbourhoods in a city in France.
- Participants were recruited with the involvement of field investigators from the population of the three neighbourhoods. They also participated to the individual questionnaire design.
- Data collection of socioeconomic information was restricted to the neighbourhoods of residence and housing for reasons of study acceptability.
- Behaviours and compliance with barrier measures were not studied in our analysis due to a change in behaviour in the population during the lockdown.

## INTRODUCTION

With the emergence of COVID-19 and the resulting pandemic, questions about social inequalities in health during the current crisis have been raised<sup>1</sup>. Many health issues are involved, including inequalities in exposure to the SARS-CoV-2 virus, in the severity of the COVID-19 disease, and in access to healthcare<sup>1 2</sup>. These concerns are all the more important given that these health inequalities are often cumulative<sup>3</sup>, leading to a marked risk of increased social deprivation in vulnerable populations<sup>2 4</sup>. Furthermore, lockdowns implemented in many countries have exacerbated pre-existing health inequalities.

During the ongoing epidemic, special attention has been given to the some 10,000 residents living in three of the poorest neighbourhoods (Haut-Vernet, Nouveau Logis and Saint-Jacques) in all of France. Located in the city of Perpignan (120,000 inhabitants, Occitania region), the employment rate is very low in these neighbourhoods, with only 25 to 30% of 15-64 year olds having work<sup>5</sup>. Sedentary gypsy communities make up a large part of the neighbourhoods' population and share commonalities in lifestyle and culture, with the roles of family and religion being especially important. In Europe, gypsy communities have lower education levels and higher unemployment rates than the general public. They often have poorer living conditions and commonly face social exclusion<sup>6</sup>. Furthermore, their health literacy level is low. Their perception of health is that no illness exists if there are no visible signs<sup>7</sup>. Moreover, they have a poorer health status than that of the general population and face greater barriers to accessing healthcare<sup>8-10</sup>.

The first wave of the COVID-19 pandemic hit France at the beginning of 2020, leading to a national lockdown between 17 March and 11 May 2020. After the first positive case in Perpignan was detected using RT-PCR on 11 March 2020, the epidemic progressed rapidly in the city. On 20 March 2020, there were 47 confirmed cases in all the Pyrénées-Orientales 'department' (administrative area larger than a district but smaller than a region) (475,000 inhabitants) where Perpignan is located. On the same day, the intensive care unit in Perpignan hospital reported 19 people hospitalised and 5 deaths. An analysis by the hospital's infectious and tropical diseases unit of all those diagnosed positive indicated that most of the patients were living in the three neighbourhoods described above. In order to control the situation, a curfew was implemented throughout the city beginning 21 March 2020 and accommodation facilities were offered to facilitate isolating positive cases and persons the latter had been in contact with. Outpatient medical centres were rapidly opened in the city's most affected neighbourhoods to provide care to clinical cases and to prevent the spread of the virus in less impacted neighbourhoods. Specific surveillance based on data from these centres was also set up to monitor the evolution of the epidemic<sup>11</sup>. The mobilisation of various health and local actors ensured the swift

1  
2  
3 dissemination of specific prevention information to the population throughout the first wave. On 1  
4 May 2020, the epidemic had largely dissipated and two months after the lockdown, viral circulation  
5 was close to zero in Perpignan.  
6  
7

8 In this context, we conducted a seroprevalence study of anti-SARS-CoV-2 antibodies in Perpignan  
9 (SCoPe) in the three neighbourhoods described above to estimate the level of contamination during  
10 the first epidemic wave. In addition, we analysed environmental and behavioural factors in order to  
11 identify factors associated with increased viral circulation.  
12  
13  
14

## 15 16 **METHODS**

### 17 18 **Study design and participants**

19  
20 SCoPe is a cross-sectional seroprevalence survey of a sample of the population living in three  
21 neighbourhoods (Saint-Jacques (neighbourhood A), Haut-Vernet (neighbourhood B) and Nouveau  
22 Logis (neighbourhood C)) in the city of Perpignan (Figure 1). It was conducted between 29 June and 17  
23 July 2020.  
24  
25  
26  
27

28 The limits of neighbourhoods A and B were demarcated using data from the French National Institute  
29 of Statistics and Economic Studies (INSEE), and neighbourhood C from city data (priority  
30 neighbourhood for social actions).  
31  
32  
33

34 As sampling frames were unavailable for inhabitants or dwellings, we chose a two-stage random  
35 sampling process (households, inhabitants) stratified by neighbourhood. The field investigators criss-  
36 crossed each neighbourhood to select households for potential participation by systematic sampling  
37 from a predefined route and sampling interval generated by the research team. Depending on the  
38 household size, from one to four participants were then randomly recruited from households which  
39 agreed to participate (see: Supplemental materials - Survey procedure and logistics). Recruitment was  
40 carried out by teams of field investigators comprising members of the gypsy community and local social  
41 workers.  
42  
43  
44  
45  
46  
47

48 Individuals were eligible if they were 6 years old or over, had resided in the study area between 1  
49 January 2020 and the survey date, were physically and mentally able to move to one of the study's five  
50 purpose-built survey centres, and able to answer the survey questionnaire.  
51  
52  
53

54 Participants were referred to the neighbourhood's survey centre, where physicians used a  
55 standardized questionnaire in French - specifically designed for SCoPE - to collect information on the  
56 following: socio-demographic characteristics, medical conditions associated with the risk of severe  
57 COVID-19<sup>12</sup>, occurrence of symptoms suggestive of COVID-19 and healthcare seeking behaviour since  
58  
59  
60



1  
2  
3 24 February 2020, characteristics of both the household and the housing the participant lived in during  
4 the first lockdown, knowledge of COVID-19 prevention measures, and behaviours during the first  
5 lockdown (see: Supplemental materials - Questionnaire). BMI was calculated by measuring height and  
6 weight and was categorised according to standard cut-off points for obesity ( $BMI \geq 30 \text{ kg/m}^2$ )<sup>12</sup>. Other  
7 quantitative variables (age, number of rooms, number of clinical COVID-19 cases) were categorised  
8 from the results of the univariate analysis. A blood sample was collected by venepuncture for each  
9 participant: 3.5 ml for those aged 18 years old and over, and 600µl for those aged 6-17 years old.

10  
11 The study protocol was approved by a French ethics committee (*Comité de Protection des Personnes*  
12 *Sud Est II*, Lyon, 2020-A01828-31). All participants were informed about the processing of personal  
13 data and of their rights. All gave their prior oral consent to participate. For those under 18 years of  
14 age, a parent or legal guardian provided consent.

### 22 **Patient and public involvement in research**

23  
24 The local mediators and the social workers involved in the design and the conduct of our study. The  
25 questionnaire was designed in collaboration with local mediators in order to ensure that it would be  
26 acceptable to the study population and that they could understand it. Then, they have implemented  
27 the selection phase of participants and provided them information about the survey. Participants  
28 received their individual results of antibodies anti-SARS-CoV-2 analysis the week following the samples

### 34 **Laboratory analysis**

35  
36 The samples were sent to the laboratory at Perpignan hospital at room temperature (18-25°C) after a  
37 maximum storage time of 12 hours at maximum temperature of 5°C.

38  
39 Serological tests were performed using Elecsys Anti-SARS-CoV-2<sup>13</sup>, an immunoassay for *in vitro*  
40 qualitative detection of immunoglobulin M (IgM) and immunoglobulin G (IgG) antibodies against the  
41 SARS-CoV-2 spike (S) protein in serum. Its sensitivity is 99.5% (97-100) at  $\geq 14$  days after PCR  
42 confirmation. Overall specificity is 99.8% (99.69-99.88)<sup>13</sup>.

### 48 **Statistical analysis**

49  
50 SCoPe's estimations take into account the sampling design components (stages, sampling weights,  
51 stratification). Data were weighted by the inverse of the probability of selection (sampling weight) and  
52 adjusted for the age and sex in each neighbourhood from data of selected persons who declined to  
53 participate in the study, and from post-stratification using data from the most recent population  
54 census (2017).

1  
2  
3 A person was defined seropositive if anti-SARS-CoV-2 antibodies (IgM or IgG) were detected by the  
4 immunoassay. Seroprevalence (i.e., the proportion of seropositive individuals) was estimated with a  
5 95% confidence interval (CI). It was compared between neighbourhoods and according to individual  
6 characteristics using the adjusted Wald F test. The association between seropositivity and reported  
7 symptoms was investigated in univariate analysis. Factors associated with seropositivity were then  
8 analysed using a multivariate logistic regression which took into account the sampling design.  
9 Behaviours during the lockdown were excluded from this analysis, except for leaving home to go to  
10 work. A forward selection procedure was applied with age, sex and neighbourhood being forced into  
11 the model. Variables with a p-value <0.1 were retained in the multivariate model and interactions were  
12 tested. A p-value <0.05 was considered statistically significant. Data were analysed using Stata V14.2  
13 software (StataCorp, College Station, TX, USA).  
14  
15  
16  
17  
18  
19  
20  
21

## 22 RESULTS

23  
24  
25 Of the total 1117 households initially selected for the study, 853 were visited and invited to participate  
26 (Figure 2). Of the latter, 628 (73.6%) households with 2101 eligible individuals agreed to partake in the  
27 random participant selection stage. The rate of those agreeing to partake in this stage varied between  
28 all three neighbourhoods: 78.7% in neighbourhood A, 48.7% in neighbourhood B and 98.9% in  
29 neighbourhood C. Among the 1248 individuals subsequently selected at random from the 2101 who  
30 were eligible, 700 (56.1%) went to the survey centres and were included in the analysis (i.e., study  
31 population): 312 from neighbourhood A (48.4%), 173 from neighbourhood B (70.0%) and 215 from  
32 neighbourhood C (60.4%).  
33  
34  
35  
36  
37  
38

### 39 Study population

40  
41 After weighting, females accounted for 50.4% of the study population. One third (34.3%) of the  
42 population was aged between 6 and 19 years old, 53.7% between 20 and 64 years old, while 12.0%  
43 were 65 years old or over.  
44  
45  
46

47 Obesity prevalence was 40.7% (95% CI: 35.8-45.8): 43.5% (38.9-48.3) in adults ( $BMI \geq 30 \text{ kg/m}^2$ ) and  
48 34.0% (22.2-48.2) in those aged 6-17 years old ( $BMI \geq IOTF-30$ ). Fifteen percent (13.0-17.3) of the study  
49 population reported having hypertension, 7.0% (5.5-8.8) heart disease, 9.4% (7.7-11.4) were being  
50 treated for diabetes, 5.5% (4.0-7.7) had asthma, while 4.9% (3.7-6.6) had (an) other chronic respiratory  
51 disease(s).  
52  
53  
54

55  
56 The majority of those in neighbourhood A were living in an apartment (71.5% [64.6-77.6]), while the  
57 majority of people in neighbourhoods B and C were living in a house (73.9% [62.8-82.6] and 83.9%  
58 [79.0-87.8], respectively). The number of people per room (except the living room) in each home was  
59  
60

1  
2  
3 greater than one for 75.3% (69.9-80.1) of people living in neighbourhood A, for 55.5% (46.9-63.7) in  
4 neighbourhood B and for 80.5% (75.8-84.6) in neighbourhood C.  
5  
6

### 7 **Seroprevalence**

8  
9 Overall seroprevalence was estimated at 35.4% (30.2-41.0) for all three neighbourhoods. It was  
10 significantly higher in neighbourhood A (46.7% [39.0-54.7]) than in neighbourhoods B and C [13.9%  
11 [8.2-22.6] and 17.1% [13.0-22.2], respectively).  
12  
13  
14

### 15 **Symptoms during the study period**

16  
17 Among seropositive people, 21.7% (14.1-31.8) reported no symptoms suggestive of COVID-19 during  
18 the study period (from 24 February 2020 to the survey date). One in seven (14.6% [9.5-21.9]) of those  
19 who reported no symptoms were tested seropositive. Seropositive people mostly reported unusual  
20 fatigue (58.9% [48.9-68.2]), a headache (51.7% [42.4-60.9]), ageusia/anosmia (49.8% [40.2-59.4]), a  
21 fever or a feeling of having a fever (49.1% [40.6-57.6]), a cough (46.4% [37.5-55.5]) and myalgia (45.7%  
22 [37.4-54.3]).  
23  
24  
25  
26  
27

28 There was a significant positive association between seropositivity and symptoms (Odds Ratio  
29 (OR)=8.1 [4.5-14.6],  $p<0.001$ ). Ageusia/anosmia were the symptoms most strongly associated with  
30 seropositivity (OR=14.8 [7.9-27.7],  $p<0.001$ ), with positive and negative predictive values of 81.3%  
31 [71.5-88.3] and 77.3% [71.4-82.4], respectively. All other symptoms were also significantly associated  
32 with seropositivity, except for rhinorrhea (Figure 3).  
33  
34  
35  
36  
37

### 38 **Healthcare seeking behaviours during the study period**

39  
40 During the study period, 15.8% (11.3-21.6) of symptomatic people consulted a COVID-19 centre when  
41 symptoms occurred and 9.6% (6.6-13.6) had a RT-PCR test (positive PCR=29.0%). Specifically, 41.8% of  
42 seropositive participants had had a positive RT-PCR test result.  
43  
44  
45

46 Among seropositive participants, 7.9% (4.6-13.2) had been hospitalised during the study period,  
47 almost all having had medical conditions associated with severe COVID-19 (89.3%).  
48  
49

### 50 **Factors associated with seropositivity**

51  
52 In the univariate analysis (Table 1), people aged 65 years or over were less likely to be seropositive  
53 ( $p<0.001$ ). No significant difference was observed between males and females regarding the likelihood  
54 of being seropositive. Obese people were more likely to be seropositive (OR=2.0 IC95%=[1.3-3.2],  
55  $p=0.002$ ). The presence of one (OR=3.0 [1.8-5.2],  $p<0.001$ ) or more (OR=7.8 [4.0-15.2],  $p<0.001$ ) clinical  
56 COVID-19 cases in the household was associated with a greater risk of seropositivity. People living in a  
57  
58  
59  
60

1  
2  
3 dwelling with three or fewer rooms (1-2 rooms: OR=2.1 [1.2-3.8], p=0.011; 3 rooms: OR=2.2 [1.3-3.9],  
4 p=0.005) were more likely to be seropositive. The proportion of seropositive people increased with  
5 the number of people per room in the dwelling (p=0.001). People who worked during the lockdown  
6 were less likely to be seropositive (OR=0.1 [0.02-0.5], p=0.006). Furthermore, people who reported  
7 leaving their home once a week or less for walks during the lockdown were less likely to be seropositive  
8 than people who went out every day or almost every day (OR=0.2 [0.1-0.7], p=0.012).  
9  
10  
11  
12  
13  
14  
15  
16  
17  
18  
19  
20  
21  
22  
23  
24  
25  
26  
27  
28  
29  
30  
31  
32  
33  
34  
35  
36  
37  
38  
39  
40  
41  
42  
43  
44  
45  
46  
47  
48  
49  
50  
51  
52  
53  
54  
55  
56  
57  
58  
59  
60

For peer review only

Table 1 - Factors associated with SARS-CoV-2 seropositivity: univariate analysis

|                                                                   | Total number | Seroprevalence (%; 95% CI) <sup>1</sup> | Unadjusted odds ratio (OR, 95% CI) | P-value |
|-------------------------------------------------------------------|--------------|-----------------------------------------|------------------------------------|---------|
| <b>Overall</b>                                                    | <b>700</b>   | <b>35.4% (30.2-41.0)</b>                | -                                  | -       |
| <b>Sex</b>                                                        |              |                                         |                                    | 0.119   |
| Male                                                              | 287          | 31.5% (24.2-40.0)                       | 1 (ref)                            |         |
| Female                                                            | 413          | 39.2% (33.1-45.6)                       | 1.4 (0.92-2.1)                     | 0.119   |
| <b>Age (years)</b>                                                |              |                                         |                                    | <0.001  |
| 6-14                                                              | 60           | 33.9% (20.0-51.3)                       | 3.0 (1.2-7.4)                      | 0.019   |
| 15-19                                                             | 57           | 50.4% (35.5-65.2)                       | 5.9 (2.6-13.3)                     | <0.001  |
| 20-64                                                             | 468          | 36.1% (30.9-41.8)                       | 3.3 (1.8-6.0)                      | <0.001  |
| ≥ 65                                                              | 115          | 14.7% (8.9-23.2)                        | 1 (ref)                            |         |
| <b>Obesity<sup>2</sup></b>                                        |              |                                         |                                    | 0.002   |
| No                                                                | 368          | 28.7% (22.4-35.8)                       | 1 (ref)                            |         |
| Yes                                                               | 315          | 44.9% (36.6-53.4)                       | 2.0 (1.3-3.2)                      | 0.002   |
| <b>Other medical conditions<sup>3</sup></b>                       |              |                                         |                                    | 0.744   |
| No                                                                | 401          | 36.4% (29.7-43.5)                       | 1 (ref)                            |         |
| Yes : one                                                         | 161          | 34.0% (25.7-43.4)                       | 0.90 (0.56-1.5)                    | 0.67    |
| Yes : several                                                     | 116          | 39.4% (29.3-50.6)                       | 1.1 (0.66-2.0)                     | 0.633   |
| <b>Clinical COVID-19 cases in the household</b>                   |              |                                         |                                    | <0.001  |
| No                                                                | 437          | 18.6% (14.3-23.7)                       | 1 (ref)                            |         |
| 1 person                                                          | 159          | 40.9% (30.7-51.9)                       | 3.0 (1.8-5.2)                      | <0.001  |
| >1 person                                                         | 104          | 64.0% (49.5-76.2)                       | 7.8 (4.0-15.2)                     | <0.001  |
| <b>Number of rooms</b>                                            |              |                                         |                                    | 0.006   |
| 1-2 rooms                                                         | 141          | 43.0% (32.4-54.2)                       | 2.1 (1.2-3.8)                      | 0.011   |
| 3 rooms                                                           | 185          | 43.9% (34.3-54.1)                       | 2.2 (1.3-3.9)                      | 0.005   |
| ≥ 4 rooms                                                         | 366          | 26.2% (19.6-34.0)                       | 1 (ref)                            |         |
| <b>Number of people per room (except living room)<sup>4</sup></b> |              |                                         |                                    | 0.001   |
| > 1 person                                                        | 435          | 40.0% (33.5-46.9)                       | 4.0 (2.0-8.2)                      | <0.001  |
| 1 person                                                          | 129          | 27.6% (19.1-38.2)                       | 2.3 (1.1-5.0)                      | 0.037   |
| < 1 person                                                        | 128          | 14.3% (7.9-24.6)                        | 1 (ref)                            |         |
| <b>Went out for work during the lockdown</b>                      |              |                                         |                                    | 0.006   |
| No                                                                | 670          | 36.5% (31.1-42.2)                       | 1 (ref)                            |         |
| Yes                                                               | 30           | 5.4% (1.1-22.2)                         | 0.10 (0.02-0.51)                   | 0.006   |
| <b>Went out for a walk during the lockdown</b>                    |              |                                         |                                    | 0.001   |
| Never                                                             | 559          | 37.5% (32.0-43.4)                       | 1.2 (0.53-2.8)                     | 0.644   |
| Sometimes (≤1 time a week)                                        | 51           | 9.7% (4.2-20.8)                         | 0.22 (0.07-0.71)                   | 0.012   |
| Almost every day                                                  | 87           | 33.0% (18.0-52.5)                       | 1 (ref)                            |         |

<sup>1</sup> Seroprevalence estimated from weighted data

<sup>2</sup> For those aged 18 years or older: BMI≥30kg/m<sup>2</sup>; for those aged 6-17 years: BMI≥IOTF-30

<sup>3</sup> Other medical conditions including: Asthma, other respiratory diseases, hypertension, heart disease, treated diabetes, treated cancer (excluding hormone therapy), HIV and immunodeficiency, chronic liver disease, chronic kidney disease, neuromuscular diseases

<sup>4</sup> Living rooms were excluded, except for single people, in order to measure the potential for isolation in the dwellings. Indicator calculated: ((number of people) / number of rooms - 1)).

1  
2  
3 In the multivariate analysis (Table 2), the association between seropositivity and the presence of  
4 clinical cases in the household remained strong after adjusting for other factors (one person: adjusted  
5 odds ratio (aOR)=2.5 [1.3-5.0],  $p=0.007$ ;  $\geq 2$  persons: aOR=6.9 [3.1-15.2],  $p<0.001$ ). People aged 15-19  
6 years (aOR 9.1 [2.8-29.8],  $p<0.001$ ) and 20-64 years (aOR=4.5 (2.0-10.1),  $p<0.001$ ) had a higher risk of  
7 being seropositive than those aged 65 years or over. Females were more likely to be seropositive than  
8 males (aOR=1.8 [1.0-3.3],  $p=0.034$ ). Seropositivity was significantly associated with obesity (aOR=2.0  
9 [1.1-3.8],  $p=0.02$ ) and other medical conditions (aOR=3.2 [1.6-6.3],  $p=0.001$ ). There was a significant  
10 interaction between the neighbourhood and the number of rooms in the dwelling ( $p=0.004$ ). People  
11 living in a one- or two-room dwelling in neighbourhood A were more likely to be seropositive than  
12 those living in a dwelling with four or more rooms (aOR=2.8 [1.2-6.3]). Working during lockdown  
13 remained independently associated with decreased seropositivity (aOR=0.2 [0.03-1.0],  $p=0.05$ ).  
14  
15  
16  
17  
18  
19  
20  
21  
22  
23  
24  
25  
26  
27  
28  
29  
30  
31  
32  
33  
34  
35  
36  
37  
38  
39  
40  
41  
42  
43  
44  
45  
46  
47  
48  
49  
50  
51  
52  
53  
54  
55  
56  
57  
58  
59  
60

Table 2 - Factors associated with SARS-CoV-2 seropositivity: multivariate analysis

|                                                     | Adjusted Odds Ratio (aOR, 95% CI) | P-value |
|-----------------------------------------------------|-----------------------------------|---------|
| <b>Sex</b>                                          |                                   | 0.034   |
| Male                                                | 1 (ref)                           |         |
| Female                                              | 1.8 (1.0-3.3)                     | 0.034   |
| <b>Age (years)</b>                                  |                                   | <0.001  |
| 6-14                                                | 1.8 (0.53-6.1)                    | 0.344   |
| 15-19                                               | 9.1 (2.8-29.8)                    | <0.001  |
| 20-64                                               | 4.5 (2.0-10.1)                    | <0.001  |
| ≥ 65                                                | 1 (ref)                           |         |
| <b>Obesity</b>                                      |                                   | 0.024   |
| No                                                  | 1 (ref)                           |         |
| Yes                                                 | 2.0 (1.1-3.8)                     | 0.024   |
| <b>Other medical conditions</b>                     |                                   | 0.004   |
| No                                                  | 1 (ref)                           |         |
| Yes : one                                           | 1.1 (0.57-2.0)                    | 0.863   |
| Yes : several                                       | 3.2 (1.6-6.3)                     | 0.001   |
| <b>Clinical COVID-19 cases in the household</b>     |                                   | <0.001  |
| No                                                  | 1 (ref)                           |         |
| 1 person                                            | 2.5 (1.3-5.0)                     | 0.007   |
| >1 person                                           | 6.9 (3.1-15.2)                    | <0.001  |
| <b>Went out for work during the lockdown</b>        |                                   | 0.048   |
| No                                                  | 1 (ref)                           |         |
| Yes                                                 | 0.18 (0.03-1.0)                   | 0.048   |
| <b>Number of rooms by neighbourhood<sup>1</sup></b> |                                   | 0.007   |
| <b>Neighbourhood A</b>                              |                                   |         |
| 1-2                                                 | 2.8 (1.2-6.3)                     | 0.016   |
| 3                                                   | 2.2 (1.0-5.0)                     | 0.064   |
| ≥ 4                                                 | 1 (ref)                           |         |
| <b>Neighbourhood B</b>                              |                                   |         |
| 1-2                                                 | 1.5 (0.3-6.4)                     | 0.594   |
| 3                                                   | 0.23 (0.04-1.2)                   | 0.075   |
| ≥ 4                                                 | 1 (ref)                           |         |
| <b>Neighbourhood C</b>                              |                                   |         |
| 1-2                                                 | 0.58 (0.22-1.5)                   | 0.262   |
| 3                                                   | 2.3 (0.91-5.9)                    | 0.078   |
| ≥ 4                                                 | 1 (ref)                           |         |

Analysis performed on 655/700 sampled individuals.

<sup>1</sup> Model includes an interaction term: number of rooms\*neighbourhood

## DISCUSSION

Our findings from the SCoPe seroprevalence study in three socially deprived neighbourhoods with a large sedentary gypsy community in Perpignan indicate that more than one in three (35.4%) people developed antibodies against SARS-CoV-2 during the first months of the COVID-19 epidemic. In comparison, estimates for the general population in May 2020 indicated an antibody prevalence of 1.9% in the Occitania region (where Perpignan is situated) and less than 5% in France and Spain (Perpignan is located very close to the Spanish border)<sup>14 15</sup>.

Although the proportion of asymptomatic SARS-CoV-2 infections varies greatly from one study to another, the proportion we found (21.7%) was comparable with the results of two meta-analyses (20% [17-25])<sup>16</sup> (17% [14-20])<sup>17</sup>. The strong specificity of ageusia/anosmia symptoms has already been observed in other studies<sup>18</sup>. This specificity could be explored in greater depth in the context of developing a strategy for early diagnosis of COVID-19 and self-isolation.

Lower seroprevalence was reported among study participants aged 65 years and over. This may partially be explained by a result from a qualitative study simultaneously conducted with SCoPe which found that this older population went outdoors less frequently and had fewer social contacts during the first wave of the epidemic thanks to the very protective stance adopted by the local community (Guillaume Sudérie, personal communication, 2020). In addition, females were more likely to be seropositive in the multivariate analysis. The associations between seropositivity and age and between seropositivity and sex differ between studies, although several have found a lower seroprevalence among older people, particularly in France<sup>14 19</sup>. The fact that few seroprevalence studies have been conducted to date in a similar context (high level of infection, socially deprived neighbourhood) could explain these differences.

Our results showed that obese people had higher seroprevalence of SARS-CoV-2 antibodies independently from other factors. This is consistent with the findings of a meta-analysis of 20 published studies on the subject (OR=1.46 [1.30-1.65])<sup>20</sup>. Obesity has been associated with low socioeconomic status<sup>21</sup>. The association we found between obesity and seropositivity may be explained by potential confounders linked to unfavourable socioeconomic conditions. SCoPe did not comprehensively measure these conditions for reasons of study acceptability. Metabolic and immune dysfunction and inflammatory mechanisms may be implicated in the clinical aggravation of COVID-19 in obese people<sup>22 23</sup>. These mechanisms might also be involved in increasing the risk of infection, although this association is less well established. Prolonged viral shedding in obese people, something already seen for influenza<sup>24</sup>, may also occur for SARS-CoV-2 and could play a role in the spread of the virus in families where obesity is prevalent.



1  
2  
3 Our study also confirms findings elsewhere that the risk of transmission is greater when a clinical case  
4 is present in the same household<sup>14 15</sup>. Working outside the home during the first lockdown was  
5 associated with a lower risk of seropositivity. This result may reflect a higher socioeconomic status of  
6 people who worked. It might also be explained by a reduction in close indoor contacts with other  
7 household members, something highlighted in a seroprevalence study among socially deprived  
8 populations living in overcrowded residences in the Paris region<sup>25</sup>.  
9

10  
11  
12  
13  
14 In our study, seroprevalence was higher for people living in crowded housing, and after adjusting for  
15 other factors, small dwelling size was a significant associated factor, but only in neighbourhood A. This  
16 result was also found in other French studies<sup>14 25</sup>. In addition, living conditions - not analysed in our  
17 study - may also explain the higher seroprevalence in this particular neighbourhood. Population  
18 density, a factor associated with higher seroprevalence elsewhere<sup>14 15</sup>, was higher in neighbourhood A  
19 than in both other neighbourhoods. The majority of accommodation in neighbourhood A comprises  
20 flats, and almost one-quarter of all dwellings are less than 40m<sup>2</sup> <sup>26</sup>. Insalubrity was also very present in  
21 neighbourhood A, which is one of the priority areas in an ongoing national urban renewal programme  
22 <sup>27</sup>. Accordingly, ventilation problems, lack of outdoor space and overcrowding may explain the higher  
23 risk of contamination. In general, the community-based lifestyle of the gypsy population may also have  
24 increased the risk of contact with a clinical COVID-19 case.  
25  
26  
27  
28  
29  
30  
31  
32  
33  
34

35 Overall, we achieved a 56% participation rate in this difficult-to-reach population thanks to local  
36 mediators and contacts, whose collaboration was essential. Furthermore, despite the unavailability of  
37 sampling frames, the study was designed and implemented very quickly after the first wave ended,  
38 thanks to careful training and supervision of the interviewers throughout the field survey. This speed  
39 of implementation was necessary given the uncertainties surrounding the duration of SARS-CoV-2 IgG  
40 antibodies after infection.  
41  
42  
43  
44  
45

46 Our study has several limitations. First, it was conducted 4 months after the first wave ended, leading  
47 to possible recall bias in the reporting of symptoms. The assessment of behaviours during lockdown  
48 was very complex because of the fact that their evolution was not measured during the course of the  
49 first wave. It is important to underline that a qualitative study observed a shift in the three  
50 neighbourhoods' awareness of the dangers of COVID-19 following the first deaths, particularly that of  
51 a young woman (Guillaume Sudérie, personal communication, 2020). The same study observed a  
52 substantial improvement in compliance with prevention measures during the lockdown. This is why  
53 the association between these behaviours and seropositivity (except for going out to work) was not  
54 studied in our analysis. Second, the systematic sampling method used to select households made it  
55  
56  
57  
58  
59  
60

1  
2  
3 difficult to estimate the total number of individuals to approach. Third, we also had difficulties reaching  
4 some of the selected households, despite flyers being placed in letterboxes and several visits. Finally,  
5 selection bias may have occurred. More specifically, people with a history of COVID-19 type symptoms  
6 may have been more willing to participate in the study than people with no such history. It is also  
7 possible that people who had been tested positive before the study were less willing to participate.  
8 Incomplete data on reasons for non-response prevented us from further exploring this issue.  
9

10  
11  
12  
13  
14 The high estimated seroprevalence after the first wave of SARS-CoV-2 infection in the three socially  
15 deprived neighbourhoods in the present study confirms the very high vulnerability to COVID-19 of  
16 populations living in socially deprived conditions, and underlines the need for more sophisticated  
17 surveillance and specific disease prevention measures<sup>29</sup>. Additional observations using a sociological  
18 approach, should provide an accurate assessment of the ability of this population to improve their  
19 level of health literacy and to assimilate protective measures. Although underlying mechanisms remain  
20 unclear, our results support previous findings that obese individuals are at higher risk of SARS-CoV-2  
21 infection, and confirm the importance of conducting preventive interventions in this population. This  
22 is especially relevant as future vaccines might be less effective for these people<sup>22 24</sup>. All future  
23 vaccination strategies should be designed to ensure that they are acceptable to this vulnerable  
24 population<sup>30</sup>.  
25  
26  
27  
28  
29  
30  
31

32  
33 The long-term protection of vulnerable populations such as that in the present study who are  
34 particularly exposed to health and environmental crises, must be improved by strengthening specific  
35 prevention and health promotion programmes and reducing social inequalities in health<sup>31</sup>. In this  
36 context, policies against substandard housing have a key role in improving living conditions. Finally,  
37 health strategies can only be successful by ensuring long-term partnerships with organisations and  
38 stakeholders capable of rapid mobilisation in the event of a crisis.  
39  
40  
41  
42  
43  
44  
45  
46  
47  
48  
49  
50  
51  
52  
53  
54  
55  
56  
57  
58  
59  
60

## CONTRIBUTORS

AB: responsible for data analysis, data interpretation, manuscript writing and submission and participated in study design, protocol writing, data collection (coordination) and training of field investigators ; CD: responsible for study design, online questionnaire and participated in protocol writing, data collection (coordination), data analysis, data manuscript writing ; ML: responsible for protocol writing and participated in study design, data collection (coordination), training of field investigators, data interpretation and manuscript writing ; VS: participated in data collection (coordination), training of field investigators, data interpretation and manuscript writing ; HN and YLS: participated in data analysis and manuscript revision ; DD: participated in data collection (coordination) and manuscript revision ; LC and MM: participated in data collection (serology) and manuscript revision ; PG: responsible for serological analysis ; DM: responsible for organising data collection and ethics committee approval and participated in study design, protocol writing, data collection, data interpretation, manuscript writing and submission ; HA: initiated the study, responsible for organising data collection and participated in ethics committee approval, data interpretation and manuscript writing.

## ACKNOWLEDGMENTS

We would like to thank the field-based interviewers, the nursing staff (Centre Hospitalier de Perpignan, Perpignan, France) and Anne Guinard (Santé publique France, the national public health agency, Saint-Maurice, France) who participated in the recruitment phase of the study. We thank Clothilde Hachin (Santé publique France, Saint-Maurice, France) for her support on the study protocol, Séverine Bailleul (Santé publique France, Saint-Maurice, France) for her help during preparation of the study, Gabrielle Jones (Santé publique France, Saint-Maurice, France) for her technical support, and Jude Sweeney (translator/copyeditor) for the English revision.

## FUNDING

This study was done by Perpignan Hospital and Santé publique France, the national public health agency, as part of their missions from the routine institutional funds. Both structures are funded by the French ministry of health.

## COMPETING INTERESTS

None declared

## DATA AVAILABILITY

Data may be obtained from a third party and are not publicly available: Anonymised data are available for researchers from the corresponding author, Damien Mouly, on reasonable request.

For peer review only

## REFERENCES

1. Bambra C, Riordan R, Ford J, et al. The COVID-19 pandemic and health inequalities. *J Epidemiol Community Health* 2020;74(11):964-68. doi: 10.1136/jech-2020-214401
2. DREES. Les inégalités sociales face à l'épidémie de Covid-19. Etat des lieux et perspectives [in French]. Les dossiers de la DREES, 2020:40.
3. Bajos N, Warszawski J, Pailhé A, et al. Les inégalités sociales au temps du COVID-19 [in French]. *Questions de Santé Publique: IReSP*, 2020:12.
4. Abedi V, Olulana O, Avula V, et al. Racial, Economic, and Health Inequality and COVID-19 Infection in the United States. *J Racial Ethn Health Disparities* 2020:1-11. doi: 10.1007/s40615-020-00833-4 [published Online First: 2020/09/03]
5. Bordet C, Bourniquel C, Flachère M, et al. Quartiers prioritaires de la politique de la ville en Occitanie : les multiples visages de la pauvreté. *Insee Dossier Occitanie: Insee Occitanie*, 2018:151-55.
6. Parekh N, Rose T. Health inequalities of the Roma in Europe: a literature review. *Cent Eur J Public Health* 2011;19(3):139-42. [published Online First: 2011/10/27]
7. Ramos-Morcillo AJ, Leal-Costa C, Hueso-Montoro C, et al. Concept of Health and Sickness of the Spanish Gypsy Population: A Qualitative Approach. *Int J Environ Res Public Health* 2019;16(22) doi: 10.3390/ijerph16224492 [published Online First: 2019/11/20]
8. Hajioff S, McKee M. The health of the Roma people: a review of the published literature. *J Epidemiol Community Health* 2000;54(11):864-9. doi: 10.1136/jech.54.11.864 [published Online First: 2000/10/12]
9. Cook B, Wayne GF, Valentine A, et al. Revisiting the evidence on health and health care disparities among the Roma: a systematic review 2003-2012. *Int J Public Health* 2013;58(6):885-911. doi: 10.1007/s00038-013-0518-6 [published Online First: 2013/10/08]
10. McFadden A, Siebelt L, Gavine A, et al. Gypsy, Roma and Traveller access to and engagement with health services: a systematic review. *Eur J Public Health* 2018;28(1):74-81. doi: 10.1093/eurpub/ckx226 [published Online First: 2018/01/19]
11. Simac L, Ledrans M, Catelinois O, et al. COVID-19 in the vulnerable population of the Saint-Jacques and Haut-Vernet districts of Perpignan (France): Health surveillance carried out using local data [in French]. *Bull Epidémiol Hebd* 2020(30):590-98.
12. Haut Conseil de la santé publique. Avis du 29 octobre 2020 relatif à l'actualisation de la liste des facteurs de risque de forme grave de Covid-19 [in French]. Paris, 2020:34.
13. Muench P, Jochum S, Wenderoth V, et al. Development and Validation of the Elecsys Anti-SARS-CoV-2 Immunoassay as a Highly Specific Tool for Determining Past Exposure to SARS-CoV-2. *J Clin Microbiol* 2020;58(10) doi: 10.1128/JCM.01694-20 [published Online First: 2020/08/05]

- 1  
2  
3 14. Warszawski J, Bajos N, Meyer L, et al. In May 2020, 4.5% of the population of metropolitan France  
4 had developed antibodies against SARS-CoV-2 - The first results of the EpiCov national survey.  
5 Études et résultats: Drees, 2020:6.  
6
- 7  
8 15. Pollán M, Pérez-Gómez B, Pastor-Barriuso R, et al. Prevalence of SARS-CoV-2 in Spain (ENE-COVID):  
9 a nationwide, population-based seroepidemiological study. *Lancet* 2020;396(10250):535-44.  
10 doi: 10.1016/s0140-6736(20)31483-5 [published Online First: 2020/07/10]  
11
- 12  
13 16. Buitrago-Garcia D, Egli-Gany D, Counotte MJ, et al. Occurrence and transmission potential of  
14 asymptomatic and presymptomatic SARS-CoV-2 infections: A living systematic review and  
15 meta-analysis. *PLoS Med* 2020;17(9):e1003346. doi: 10.1371/journal.pmed.1003346  
16 [published Online First: 2020/09/23]  
17
- 18  
19 17. Byambasuren O, Cardona M, Bell K, et al. Estimating the extent of asymptomatic COVID-19 and its  
20 potential for community transmission: Systematic review and meta-analysis. *Official Journal*  
21 *of the Association of Medical Microbiology and Infectious Disease Canada* 2020 doi:  
22 10.3138/jammi-2020-0030  
23
- 24  
25 18. Makaronidis J, Mok J, Balogun N, et al. Seroprevalence of SARS-CoV-2 antibodies in people with an  
26 acute loss in their sense of smell and/or taste in a community-based population in London, UK:  
27 An observational cohort study. *PLoS Med* 2020;17(10):e1003358. doi:  
28 10.1371/journal.pmed.1003358 [published Online First: 2020/10/02]  
29
- 30  
31 19. Stringhini S, Wisniak A, Piumatti G, et al. Seroprevalence of anti-SARS-CoV-2 IgG antibodies in  
32 Geneva, Switzerland (SEROCoV-POP): a population-based study. *Lancet* 2020;396(10247):313-  
33 19. doi: 10.1016/S0140-6736(20)31304-0 [published Online First: 2020/06/15]  
34
- 35  
36 20. Popkin BM, Du S, Green WD, et al. Individuals with obesity and COVID-19: A global perspective on  
37 the epidemiology and biological relationships. *Obes Rev* 2020;21(11):e13128. doi:  
38 10.1111/obr.13128 [published Online First: 2020/08/28]  
39
- 40  
41 21. Vernay M, Malon A, Oleko A, et al. Association of socioeconomic status with overall overweight  
42 and central obesity in men and women: the French Nutrition and Health Survey 2006. *BMC*  
43 *Public Health* 2009;9:215. doi: 10.1186/1471-2458-9-215 [published Online First: 2009/07/04]  
44
- 45  
46 22. Alberca RW, Oliveira LM, Branco A, et al. Obesity as a risk factor for COVID-19: an overview. *Crit*  
47 *Rev Food Sci Nutr* 2020:1-15. doi: 10.1080/10408398.2020.1775546 [published Online First:  
48 2020/06/17]  
49
- 50  
51 23. Goossens GH, Dicker D, Farpour-Lambert NJ, et al. Obesity and COVID-19: A Perspective from the  
52 European Association for the Study of Obesity on Immunological Perturbations, Therapeutic  
53 Challenges, and Opportunities in Obesity. *Obes Facts* 2020;13(4):439-52. doi:  
54 10.1159/000510719 [published Online First: 2020/08/14]  
55  
56  
57  
58  
59  
60

- 1  
2  
3 24. Luzi L, Radaelli MG. Influenza and obesity: its odd relationship and the lessons for COVID-19  
4 pandemic. *Acta Diabetol* 2020;57(6):759-64. doi: 10.1007/s00592-020-01522-8 [published  
5 Online First: 2020/04/07]  
6  
7  
8 25. Roederer T, Mollo B, Vincent C, et al. Seroprevalence and risk factors of exposure to COVID-19 in  
9 homeless people in Paris, France: a cross-sectional study. *Lancet Public Health* 2021 doi:  
10 10.1016/s2468-2667(21)00001-3 [published Online First: 2021/02/09]  
11  
12  
13 26. Insee. Logement en 2017 : Recensement de la population - Base infracommunale (IRIS) [in French]:  
14 Insee, 2020.  
15  
16 27. Ministry of the City, Youth and Sports. Arrêté du 29 avril 2015 relatif à la liste des quartiers  
17 prioritaires de la politique de la ville présentant les dysfonctionnements urbains les plus  
18 importants et visés en priorité par le nouveau programme national de renouvellement urbain  
19 [in French]: JORF n°0106 [NOR: VJSV1508731A]; 2015 [updated 2015 May 8; cited 2021 Jan  
20 20]. Available from: [https://www.legifrance.gouv.fr/loda/id/LEGITEXT000030556555/2020-  
21 08-28/](https://www.legifrance.gouv.fr/loda/id/LEGITEXT000030556555/2020-08-28/) accessed Jan 20 2021.  
22  
23  
24  
25  
26 28. Roederer T, Mollo B, Vincent C, et al. High seroprevalence of SARS-CoV-2 antibodies among people  
27 living in precarious situations in Ile de France. *medRxiv* 2020:25. doi:  
28 10.1101/2020.10.07.20207795  
29  
30  
31 29. Burström B, Tao W. Social determinants of health and inequalities in COVID-19. *Eur J Public Health*  
32 2020;30(4):617-18. doi: 10.1093/eurpub/ckaa095 [published Online First: 2020/07/09]  
33  
34  
35 30. Jackson C, Bedford H, Cheater FM, et al. Needles, Jabs and Jags: a qualitative exploration of barriers  
36 and facilitators to child and adult immunisation uptake among Gypsies, Travellers and Roma.  
37 *BMC Public Health* 2017;17(1):254. doi: 10.1186/s12889-017-4178-y [published Online First:  
38 2017/03/16]  
39  
40  
41 31. Fernández-Feito A, Pesquera-Cabezas R, González-Cobo C, et al. What do we know about the health  
42 of Spanish Roma people and what has been done to improve it? A scoping review. *Ethn Health*  
43 2019;24(2):224-43. doi: 10.1080/13557858.2017.1315373 [published Online First:  
44 2017/04/12]  
45  
46  
47  
48  
49  
50  
51  
52  
53  
54  
55  
56  
57  
58  
59  
60

## FIGURES

Figure 1 - Map of the city of Perpignan and the three neighbourhoods studied

Figure 2 – Flow chart of participants

Figure 3 - Association between seropositivity and reporting symptoms

\* Analysis performed on all sampled individuals (n=700) using simple logistic regressions.

For peer review only



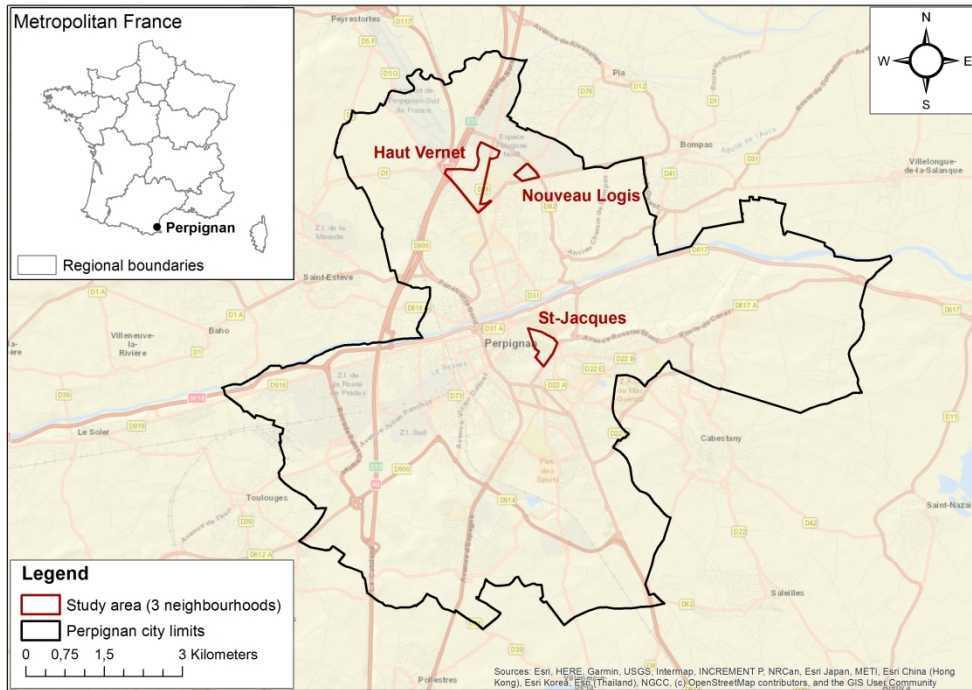

Figure 1 - Map of the city of Perpignan and the three neighbourhoods studied

297x209mm (300 x 300 DPI)

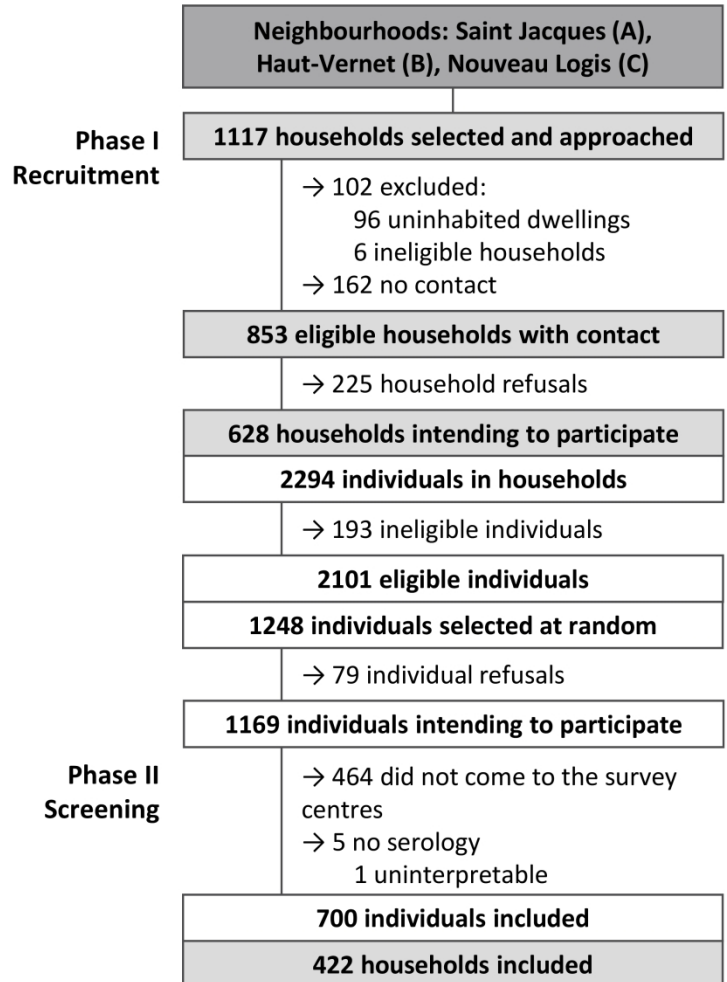

Figure 2 – Flow chart of participants

209x297mm (300 x 300 DPI)

1  
2  
3  
4  
5  
6  
7  
8  
9  
10  
11  
12  
13  
14  
15  
16  
17  
18  
19  
20  
21  
22  
23  
24  
25  
26  
27  
28  
29  
30  
31  
32  
33  
34  
35  
36  
37  
38  
39  
40  
41  
42  
43  
44  
45  
46  
47  
48  
49  
50  
51  
52  
53  
54  
55  
56  
57  
58  
59  
60

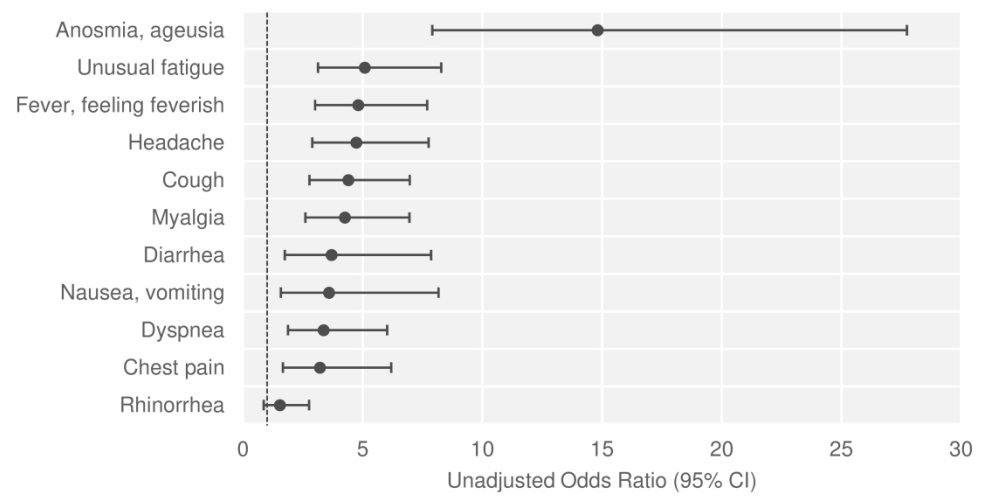

Figure 3 - Association between seropositivity and reporting symptoms  
\* Analysis performed on all sampled individuals (n=700) using simple logistic regressions.

## SUPPLEMENTAL MATERIALS

### Survey procedure and logistics

All the interviewers were initially trained in the study method and the use of the survey tools (online questionnaire, household forms, logbooks). They were supervised throughout the survey. In total, the study mobilised almost 80 people.

Local mediators and social workers implemented the selection phase (households and inhabitants) and provided potential participants with information about the survey. For this purpose, they had a map of each neighbourhood describing the starting point and a specific route to be followed. These starting points were defined randomly from a grid of neighbourhood maps as follows: randomly drawing a grid cell and, after assigning a number to each building, randomly choosing one building on that grid cell to be the starting point. The starting direction was also randomly chosen. In neighbourhood A, every 2 out of 5 households were selected, while in neighbourhood B, every 2 out of 3 were selected. In neighbourhood C, all households were selected. These sampling intervals were determined according to the size of the targeted sample, the estimated non-response rate, the number of dwellings in the neighbourhood, and the average number of people per household in the population census. The sampling intervals were then adjusted to take into account field observations during the first days of the survey. The a priori targeted sample size was 1,000 participants, equally distributed among the three neighbourhoods, for an expected prevalence of 10%, a margin of error of 2.5 percentage points and a design effect of 2.

In each selected household, between one and four participants were randomly selected in proportion to the size of the household. The selected inhabitants received information notes and a ticket indicating their name and surname and the fact that they had been selected for participation. They were then invited to visit one of the five centres specifically set up for the survey (2 each in neighbourhoods A and B, 1 in neighbourhood C), and to bring their ticket with them to facilitate their identification and inclusion. All the initially selected households and their inhabitants were monitored using logbooks and forms to record household data. To increase the participation rate, three visits were made at different days and times. When no one was at home, a letter with a phone number was put in the letterbox. People who agreed to participate but who did not visit a survey centre were called back by phone.

In the survey centres, doctors and nurses from the infectious and tropical diseases unit (SMIT) of Perpignan hospital checked the identity of participants, administered a face-to-face questionnaire and took blood samples. Answers to the questionnaire items were entered in real-time online on a secure

1  
2  
3 Voozanoo™ platform. Children under 18 years had to be accompanied by a parent or legal  
4 representative, and participants who did not speak French very well could - if they wished - be  
5 accompanied by a family member or friend who did. The weight and height of the participants were  
6 measured at the time of the questionnaire. A doctor gave individual results to those tested in  
7 July/August 2020.  
8  
9  
10  
11  
12  
13  
14  
15  
16  
17  
18  
19  
20  
21  
22  
23  
24  
25  
26  
27  
28  
29  
30  
31  
32  
33  
34  
35  
36  
37  
38  
39  
40  
41  
42  
43  
44  
45  
46  
47  
48  
49  
50  
51  
52  
53  
54  
55  
56  
57  
58  
59  
60

For peer review only

## Questionnaire

French version / [English translation](#)

Date d'enquête :/ [Survey date](#): ..../..../2020

Centre de prélèvement :  St Jacques  
[Test centre](#)  Haut-Vernet  
 Nouveau logis

Acceptez-vous de participer à cette étude c'est-à-dire de répondre à ce questionnaire et de réaliser un prélèvement de sang ? / [Do you agree to participate in this study, that is to say, to answer this questionnaire and to have a blood sample taken?](#)

oui / [yes](#)  non / [no](#)

*Si non, le participant refuse → stopper l'entretien*  
*If no, the participant refuses → end the interview*

Age :/ [Age](#): .....

Sexe :/ [Sex](#):  Homme/Garçon / [Male](#)  Femme/Fille / [Female](#)

Poids (en kg) :/ [Weight](#): .....

Taille (en cm) :/ [Height](#): .....

Antécédents médicaux :/ [Medical history](#):

- |                                                                                 |                                                                                               |
|---------------------------------------------------------------------------------|-----------------------------------------------------------------------------------------------|
| <input type="checkbox"/> Aucun                                                  | <input type="checkbox"/> None                                                                 |
| <input type="checkbox"/> grossesse en cours                                     | <input type="checkbox"/> <a href="#">Current pregnancy</a>                                    |
| <input type="checkbox"/> Asthme /                                               | <input type="checkbox"/> <a href="#">Asthma</a>                                               |
| <input type="checkbox"/> Autres maladies respiratoires (bronchite chronique...) | <input type="checkbox"/> <a href="#">Other respiratory diseases</a>                           |
| <input type="checkbox"/> Hypertension                                           | <input type="checkbox"/> <a href="#">Hypertension</a>                                         |
| <input type="checkbox"/> maladie cardiaque (angine de poitrine, infarctus)      | <input type="checkbox"/> <a href="#">Heart disease</a>                                        |
| <input type="checkbox"/> diabète traité                                         | <input type="checkbox"/> <a href="#">Treated diabetes</a>                                     |
| <input type="checkbox"/> Cancer en cours de traitement (sauf hormonothérapie)   | <input type="checkbox"/> <a href="#">Being treated for cancer (excluding hormone therapy)</a> |
| <input type="checkbox"/> VIH et autres troubles de l'immunité                   | <input type="checkbox"/> <a href="#">HIV and other immune disorders</a>                       |
| <input type="checkbox"/> maladies chroniques du foie                            | <input type="checkbox"/> <a href="#">Chronic liver disease</a>                                |
| <input type="checkbox"/> maladies rénales chroniques                            | <input type="checkbox"/> <a href="#">Chronic kidney disease</a>                               |
| <input type="checkbox"/> autre ALD, précisez : .....                            | <input type="checkbox"/> <a href="#">Other chronic disease: .....</a>                         |

Depuis le 24 février (à la fin des vacances scolaires d'hiver/semaine du Mardi Gras), avez-vous eu des symptômes que vous n'avez pas habituellement et qui ont duré au moins 3 jours ? / [Since the 24<sup>th</sup> February \(at the end of the winter school holidays/Mardi Gras week\), have you had any symptoms that you don't usually have and that lasted at least 3 days?](#)

oui / [yes](#)  non / [no](#)

**Si oui / [If yes](#):**

Quels symptôme(s) avez-vous eu ? / [What symptom\(s\) have you had?](#)

- Fièvre ou sensation de fièvre  [Fever or feeling feverish](#)  
 Mal à tête  [Headache](#)

- |                                                                              |                                                                            |
|------------------------------------------------------------------------------|----------------------------------------------------------------------------|
| <input type="checkbox"/> Fatigue inhabituelle                                | <input type="checkbox"/> Unusual fatigue                                   |
| <input type="checkbox"/> Courbatures / douleurs musculaires                  | <input type="checkbox"/> Body aches, muscle pain                           |
| <input type="checkbox"/> Toux                                                | <input type="checkbox"/> Cough                                             |
| <input type="checkbox"/> Difficultés respiratoires, essoufflement inhabituel | <input type="checkbox"/> Difficulty breathing, unusual shortness of breath |
| <input type="checkbox"/> Nez qui coule                                       | <input type="checkbox"/> Runny nose                                        |
| <input type="checkbox"/> Troubles du goût/de l'odorat                        | <input type="checkbox"/> Taste/smell disorders                             |
| <input type="checkbox"/> Nausées/vomissements                                | <input type="checkbox"/> Nausea, vomiting                                  |
| <input type="checkbox"/> Diarrhée                                            | <input type="checkbox"/> Diarrhoea                                         |
| <input type="checkbox"/> Douleurs thoraciques, oppression                    | <input type="checkbox"/> Chest pain, oppression                            |
| <input type="checkbox"/> Si ≥80 ans : Confusion, chutes répétées             | <input type="checkbox"/> If ≥80 years: Confusion, repeated falls           |

Quand ont commencé ces symptômes ? (si plusieurs périodes : prendre les symptômes les plus proches du Covid-19 ou si impossible de différencier prendre la 1<sup>ère</sup> période) / When did these symptoms start? (if more than one period: record the time when the symptoms which most closely resemble those of Covid-19 started, or if it is impossible to differentiate between periods, take the first period)

- avant confinement (17/03) / Before the lockdown (17/03)
- Pendant confinement (17/03) et avant 1 mai / During the lockdown (17/03) and before the 1<sup>st</sup> of May
- après le 1<sup>er</sup> mai / After the 1<sup>st</sup> of May

[ Si après le 1<sup>er</sup> mai : Avez-vous eu des signes au cours des 15 derniers jours ? / If after the 1<sup>st</sup> of May: have you had any symptoms in the last fortnight?

- oui / yes  non / no

Ces symptômes vous ont-ils fait penser que vous aviez peut-être le coronavirus ? / Did these symptoms lead you think that you might have COVID-19?

- Non / No  oui peut-être / Yes, maybe  oui sûrement / Yes, definitely

Avez-vous consulté un professionnel de santé pour ces symptômes ? / Did you consult a health professional for these symptoms?

- oui / yes  non / no

[ Si oui : qui avez-vous consulté ? / If yes: Who did you consult?

- Médecin traitant / General practitioner
- Centre covid / Covid centre
- Hôpital, urgence (sans hospitalisation) / Hospital, emergency department (without hospitalisation)
- Autre, précisez : / other, specify: .....

Avez-vous été hospitalisé en raison de ces symptômes ? / Were you hospitalized because of these symptoms?

- oui / yes  non / no

[ Si oui : combien de temps avez-vous été hospitalisé (en nombre de jours) ? / If yes: how long were you hospitalised (number of days)? : ....

Avez-vous été hospitalisé en service de réanimation ? / Were you hospitalised in an intensive care unit?

- oui / yes  non / no

Avez-vous eu ... ? / *Did you have a ... ?*

Test PCR (coton-tige) / *PCR test (swab/cotton bud)*

Si oui / *If yes* :  positif / *positive*  négatif / *negative*  Ne sait pas / *Don't know*

Sérologie (prise de sang) / *Serology test (blood sample)*

Si oui / *If yes* :  positif / *positive*  négatif / *negative*  Ne sait pas / *Don't know*

Scanner thoracique / *Chest CT scan*

Si oui : / *If yes*:  évocateur du Covid-19 / *suggestive*  non évocateur / *not suggestive*

Ne sait pas / *Don't know*

A votre connaissance depuis le 24 février, avez-vous été en contact avec une ou plusieurs personnes malades (toux ou fièvre ou test positif ou consultation pour une suspicion de coronavirus) à l'extérieur de votre logement ? / *To your knowledge, since the 24<sup>th</sup> February, have you been in contact with one or more sick people (cough or fever or positive test or consultation because of suspected COVID-19) outside your home?*

oui / *yes*  non / *no*  Ne sait pas / *Don't know*

#### Logement : / *Housing*:

En ce moment, combien de personnes habitent dans le logement où vous vivez actuellement (y compris vous-même) ? / *How many people live in your current home (including you)?* .....

Nous allons maintenant parlé du logement principal dans lequel vous viviez pendant les 2 mois du confinement. (si plusieurs endroits, prendre la plus longue durée)

*We are now going to talk about the main accommodation where you lived during the two months of lockdown (if more than one place, take the place where respondent lived longest)*

Est-ce le logement dans lequel vous habitez actuellement ? / *Is that your current home?*

oui / *yes*  non / *no*

Si le participant répond non : Vous avez passé la majorité de votre confinement dans un logement différent de votre logement actuel. Ce logement était-il dans le quartier :

*If the respondent replies 'no': You spent the majority of the lockdown in a home other than your current home. In which neighbourhood was that accommodation located?*

St Jacques

Nouveau logis

Haut-Vernet

Aucun de ces trois quartiers / *None of these three neighbourhoods*

Ce logement était : / *This accommodation is/was:*

Un appartement / *An apartment*

Une maison / *A house*

Autre, précisez : .... / *Other, specify:.....*

Combien de pièces comportaient ce logement (hors salle de bain, toilettes, cuisine) ? / *How many rooms are/were in the accommodation (excluding bathroom, toilet and kitchen)?* : ....

Avait-t-il un espace extérieur privé (jardin, terrasse, balcon) ? / *Is/Was there a private outdoor space (garden, patio, balcony)?*



oui / *yes*    non / *no*

Pendant le confinement, combien de personnes habitaient dans ce logement (y compris vous-même) ? / *During the lockdown, how many people lived in the household (including you)?* .....

Dont combien d'enfants de moins de 12 ans : / *Including children under 12 years:* ...

Dont combien d'enfants de 12 à 17 ans : / *Including children aged 12-17 years:* ...

Dont combien d'adultes de 18 ans et plus : / *Including adults aged 18 years and over:* ...

Depuis le 24 février, combien de personnes vivant dans ce logement (autre que vous) ont été malades (toux ou fièvre ou test positif ou consultation pour une suspicion de coronavirus) ? / *From the 24<sup>th</sup> of February to the end of lockdown, how many people living in this household (excluding you) have been ill (cough, fever, positive test or consultation for suspected COVID-19)?* : ...

#### Information et comportements face au Covid-19 / *Information and behaviour in the face of Covid-19*

Etes-vous sorti pendant le confinement pour le travail ? / *During the lockdown, did you go out for work?*

jamais / *never*    moins d'1 fois/semaine / *less than once a week*

1fois/semaine / *once a week*    tous les jours ou presque / *every day or almost every day*

Etes-vous sorti pendant le confinement pour les courses ? / *During the lockdown, did you go out to do the grocery shopping?*

jamais / *never*    moins d'1 fois/semaine / *less than once a week*

1fois/semaine / *once a week*    tous les jours ou presque / *every day or almost every day*

Etes-vous sorti pendant le confinement pour visiter la famille/des proches ? / *During the lockdown, did you go out to visit family/friends?*

jamais / *never*    moins d'1 fois/semaine / *less than once a week*

1fois/semaine / *once a week*    tous les jours ou presque / *every day or almost every day*

Etes-vous sorti pendant le confinement pour faire du sport/se promener ? / *During the lockdown, did you go out to play sports/for a walk?*

jamais / *never*    moins d'1 fois/semaine / *less than once a week*

1fois/semaine / *once a week*    tous les jours ou presque / *every day or almost every day*

Etes-vous sorti pendant le confinement pour une cérémonie ? / *During the lockdown, did you go out for a ceremony?*

jamais / *never*    1 fois / *once*    plusieurs fois / *several times*

Etes-vous sorti pendant le confinement pour une autre raison ? / *During the lockdown, did you go out for another reason?* :  oui, précisez : / *yes, specify:* .....

jamais / *never*    moins d'1 fois/semaine / *less than once a week*

1fois/semaine / *once a week*    tous les jours ou presque / *every day or almost every day*

Est-ce que des personnes qui n'habitaient pas dans votre logement sont venues chez vous pendant le confinement ? (Par exemple pour amener à manger ou pour des soins)

*Did people, other than people who live in the same housing as you, come to your home during the lockdown? (For example, to bring food or provide care or assistance)*

jamais / *never*    moins d'1 fois/semaine / *less than once a week*

1fois/semaine / *once a week*    tous les jours ou presque / *every day or almost every day*

1  
2  
3 Sur une échelle de 0 à 10, avez-vous eu des informations sur ce qu'il fallait faire pour se protéger et  
4 protéger les autres : lavage des mains, confinement, respect des distances avec d'autres personnes,  
5 port du masque ? (0=aucune information → 10 = informations complètes)

6 *On a scale from 0 to 10, how much information did you have on what to do to protect yourself and others:  
7 hand washing, self-isolation, social distancing, wearing a mask? (0 = no information → 10 = a great deal  
8 of information)*

9  
10  
11 0 | \_\_\_\_\_ | 10  
12

13 Avez-vous pu rester à plus d'un mètre des personnes que vous avez rencontrées à l'extérieure de votre  
14 logement pendant le confinement (par exemple : pour discuter ou dans des files d'attente) ? / *Were you  
15 able to stay more than one metre away from people you met outside your home during the lockdown ?*

16  toujours / *always*  souvent / *often*  rarement / *rarely*  jamais / *never*

17  
18 Vous êtes-vous lavé plus souvent les mains pendant le confinement ? / *Did you wash your hands more  
19 often during the lockdown?*

20  non, pas plus souvent / *no, not more often*

21  un peu plus souvent / *a little more often*

22  beaucoup plus souvent / *much more often*

23  Ne sait pas / *Don't know*  
24  
25  
26

27 Sur une échelle de 0 à 10, pensez-vous vous être protégé du virus ? (0=pas du tout → 10 =  
28 complètement)

29 *N.B. : si demande de précision : par exemple par votre respect des gestes barrières ou par le  
30 confinement*

31 *On a scale from 0 to 10, do you think you protected yourself against the virus? (0 = not at all → 10 =  
32 completely)*

33 *N.B.: if the respondent requests clarification: for example, thanks to you respecting the preventive  
34 measures or self-isolating*  
35  
36

37 0 | \_\_\_\_\_ | 10  
38  
39

40 Si une épidémie de même nature survenait, quelle serait selon vous la mesure la plus efficace à mettre  
41 en place pour vous protéger vous et vos proches ? *In your opinion, if an epidemic of the same nature  
42 occurred in the future, what would be the most effective measure to take?*

43 .....  
44 .....  
45  
46  
47  
48  
49  
50  
51  
52  
53  
54  
55  
56  
57  
58  
59  
60

STROBE Statement—Checklist of items that should be included in reports of *cross-sectional studies*

|                              | Item No | Recommendation                                                                                                                                                                                    | Page No                   |
|------------------------------|---------|---------------------------------------------------------------------------------------------------------------------------------------------------------------------------------------------------|---------------------------|
| <b>Title and abstract</b>    | 1       | (a) Indicate the study's design with a commonly used term in the title or the abstract                                                                                                            | 1                         |
|                              |         | (b) Provide in the abstract an informative and balanced summary of what was done and what was found                                                                                               | 2                         |
| <b>Introduction</b>          |         |                                                                                                                                                                                                   |                           |
| Background/rationale         | 2       | Explain the scientific background and rationale for the investigation being reported                                                                                                              | 4                         |
| Objectives                   | 3       | State specific objectives, including any prespecified hypotheses                                                                                                                                  | 5                         |
| <b>Methods</b>               |         |                                                                                                                                                                                                   |                           |
| Study design                 | 4       | Present key elements of study design early in the paper                                                                                                                                           | 5                         |
| Setting                      | 5       | Describe the setting, locations, and relevant dates, including periods of recruitment, exposure, follow-up, and data collection                                                                   | 5                         |
| Participants                 | 6       | (a) Give the eligibility criteria, and the sources and methods of selection of participants                                                                                                       | 5                         |
| Variables                    | 7       | Clearly define all outcomes, exposures, predictors, potential confounders, and effect modifiers. Give diagnostic criteria, if applicable                                                          | 5-7                       |
| Data sources/<br>measurement | 8*      | For each variable of interest, give sources of data and details of methods of assessment (measurement). Describe comparability of assessment methods if there is more than one group              | 6                         |
| Bias                         | 9       | Describe any efforts to address potential sources of bias                                                                                                                                         | 6 + 14<br>(discussion)    |
| Study size                   | 10      | Explain how the study size was arrived at                                                                                                                                                         | Supplemental<br>materials |
| Quantitative variables       | 11      | Explain how quantitative variables were handled in the analyses. If applicable, describe which groupings were chosen and why                                                                      | 6                         |
| Statistical methods          | 12      | (a) Describe all statistical methods, including those used to control for confounding                                                                                                             | 6-7                       |
|                              |         | (b) Describe any methods used to examine subgroups and interactions                                                                                                                               | 7                         |
|                              |         | (c) Explain how missing data were addressed                                                                                                                                                       | NA                        |
|                              |         | (d) If applicable, describe analytical methods taking account of sampling strategy                                                                                                                | 6-7                       |
|                              |         | (e) Describe any sensitivity analyses                                                                                                                                                             | NA                        |
| <b>Results</b>               |         |                                                                                                                                                                                                   |                           |
| Participants                 | 13*     | (a) Report numbers of individuals at each stage of study—eg numbers potentially eligible, examined for eligibility, confirmed eligible, included in the study, completing follow-up, and analysed | 7                         |
|                              |         | (b) Give reasons for non-participation at each stage                                                                                                                                              | 15 (discussion)           |
|                              |         | (c) Consider use of a flow diagram                                                                                                                                                                | Figure 2                  |
| Descriptive data             | 14*     | (a) Give characteristics of study participants (eg demographic, clinical, social) and information on exposures and potential confounders                                                          | 7-8                       |

|                          |     |                                                                                                                                                                                                              |                            |
|--------------------------|-----|--------------------------------------------------------------------------------------------------------------------------------------------------------------------------------------------------------------|----------------------------|
|                          |     | (b) Indicate number of participants with missing data for each variable of interest                                                                                                                          | 7 and figure 2             |
| Outcome data             | 15* | Report numbers of outcome events or summary measures                                                                                                                                                         | 8                          |
| Main results             | 16  | (a) Give unadjusted estimates and, if applicable, confounder-adjusted estimates and their precision (eg, 95% confidence interval). Make clear which confounders were adjusted for and why they were included | 8-12 (table 1 and table 2) |
|                          |     | (b) Report category boundaries when continuous variables were categorized                                                                                                                                    | Table 1                    |
|                          |     | (c) If relevant, consider translating estimates of relative risk into absolute risk for a meaningful time period                                                                                             | NA                         |
| Other analyses           | 17  | Report other analyses done—eg analyses of subgroups and interactions, and sensitivity analyses                                                                                                               | NA                         |
| <b>Discussion</b>        |     |                                                                                                                                                                                                              |                            |
| Key results              | 18  | Summarise key results with reference to study objectives                                                                                                                                                     | 13-14                      |
| Limitations              | 19  | Discuss limitations of the study, taking into account sources of potential bias or imprecision. Discuss both direction and magnitude of any potential bias                                                   | 14-15                      |
| Interpretation           | 20  | Give a cautious overall interpretation of results considering objectives, limitations, multiplicity of analyses, results from similar studies, and other relevant evidence                                   | 13-14 15                   |
| Generalisability         | 21  | Discuss the generalisability (external validity) of the study results                                                                                                                                        | 14-15                      |
| <b>Other information</b> |     |                                                                                                                                                                                                              |                            |
| Funding                  | 22  | Give the source of funding and the role of the funders for the present study and, if applicable, for the original study on which the present article is based                                                | 16                         |

\*Give information separately for exposed and unexposed groups.

**Note:** An Explanation and Elaboration article discusses each checklist item and gives methodological background and published examples of transparent reporting. The STROBE checklist is best used in conjunction with this article (freely available on the Web sites of PLoS Medicine at <http://www.plosmedicine.org/>, Annals of Internal Medicine at <http://www.annals.org/>, and Epidemiology at <http://www.epidem.com/>). Information on the STROBE Initiative is available at [www.strobe-statement.org](http://www.strobe-statement.org).

# BMJ Open

## Seroprevalence of anti-SARS-CoV-2 antibodies after the first wave of the COVID-19 pandemic in a vulnerable population in France: a cross-sectional study

|                                 |                                                                                                                                                                                                                                                                                                                                                                                                                                                                                                                                                                                                                                                                                                                                                                                                                                                                                                                                                                                                                                                                               |
|---------------------------------|-------------------------------------------------------------------------------------------------------------------------------------------------------------------------------------------------------------------------------------------------------------------------------------------------------------------------------------------------------------------------------------------------------------------------------------------------------------------------------------------------------------------------------------------------------------------------------------------------------------------------------------------------------------------------------------------------------------------------------------------------------------------------------------------------------------------------------------------------------------------------------------------------------------------------------------------------------------------------------------------------------------------------------------------------------------------------------|
| Journal:                        | <i>BMJ Open</i>                                                                                                                                                                                                                                                                                                                                                                                                                                                                                                                                                                                                                                                                                                                                                                                                                                                                                                                                                                                                                                                               |
| Manuscript ID                   | bmjopen-2021-053201.R1                                                                                                                                                                                                                                                                                                                                                                                                                                                                                                                                                                                                                                                                                                                                                                                                                                                                                                                                                                                                                                                        |
| Article Type:                   | Original research                                                                                                                                                                                                                                                                                                                                                                                                                                                                                                                                                                                                                                                                                                                                                                                                                                                                                                                                                                                                                                                             |
| Date Submitted by the Author:   | 06-Oct-2021                                                                                                                                                                                                                                                                                                                                                                                                                                                                                                                                                                                                                                                                                                                                                                                                                                                                                                                                                                                                                                                                   |
| Complete List of Authors:       | Beaumont, Adeline; Santé publique France, the national public health agency<br>Durand, Cécile; Santé publique France, the national public health agency<br>Ledrans, Martine; Santé publique France, the national public health agency<br>Schwoebel, Valérie; Santé publique France, the national public health agency<br>Noel, Harold; Santé publique France, the national public health agency<br>Le Strat, Yann; Santé publique France, the national public health agency<br>Diulus, Donatien; Agence Régionale de Santé Occitanie, Délégation départementale des Pyrénées-Orientales<br>Colombain, Léa; Centre Hospitalier de Perpignan, Service des Maladies Infectieuses et Tropicales<br>Médus, Marie; Centre Hospitalier de Perpignan, Service des Maladies Infectieuses et Tropicales<br>Gueudet, Philippe; Centre Hospitalier de Perpignan, Laboratoire de biochimie et de biologie<br>Mouly, Damien; Santé publique France, the national public health agency<br>Aumaître, Hugues; Centre Hospitalier de Perpignan, Service des Maladies Infectieuses et Tropicales |
| <b>Primary Subject Heading</b>: | Epidemiology                                                                                                                                                                                                                                                                                                                                                                                                                                                                                                                                                                                                                                                                                                                                                                                                                                                                                                                                                                                                                                                                  |
| Secondary Subject Heading:      | Infectious diseases, Public health                                                                                                                                                                                                                                                                                                                                                                                                                                                                                                                                                                                                                                                                                                                                                                                                                                                                                                                                                                                                                                            |
| Keywords:                       | COVID-19, PUBLIC HEALTH, Epidemiology < INFECTIOUS DISEASES                                                                                                                                                                                                                                                                                                                                                                                                                                                                                                                                                                                                                                                                                                                                                                                                                                                                                                                                                                                                                   |
|                                 |                                                                                                                                                                                                                                                                                                                                                                                                                                                                                                                                                                                                                                                                                                                                                                                                                                                                                                                                                                                                                                                                               |

SCHOLARONE™  
Manuscripts

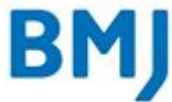

I, the Submitting Author has the right to grant and does grant on behalf of all authors of the Work (as defined in the below author licence), an exclusive licence and/or a non-exclusive licence for contributions from authors who are: i) UK Crown employees; ii) where BMJ has agreed a CC-BY licence shall apply, and/or iii) in accordance with the terms applicable for US Federal Government officers or employees acting as part of their official duties; on a worldwide, perpetual, irrevocable, royalty-free basis to BMJ Publishing Group Ltd ("BMJ") its licensees and where the relevant Journal is co-owned by BMJ to the co-owners of the Journal, to publish the Work in this journal and any other BMJ products and to exploit all rights, as set out in our [licence](#).

The Submitting Author accepts and understands that any supply made under these terms is made by BMJ to the Submitting Author unless you are acting as an employee on behalf of your employer or a postgraduate student of an affiliated institution which is paying any applicable article publishing charge ("APC") for Open Access articles. Where the Submitting Author wishes to make the Work available on an Open Access basis (and intends to pay the relevant APC), the terms of reuse of such Open Access shall be governed by a Creative Commons licence – details of these licences and which [Creative Commons](#) licence will apply to this Work are set out in our licence referred to above.

Other than as permitted in any relevant BMJ Author's Self Archiving Policies, I confirm this Work has not been accepted for publication elsewhere, is not being considered for publication elsewhere and does not duplicate material already published. I confirm all authors consent to publication of this Work and authorise the granting of this licence.

1  
2  
3 **Title: Seroprevalence of anti-SARS-CoV-2 antibodies after the first**  
4 **wave of the COVID-19 pandemic in a vulnerable population in France:**  
5  
6 **a cross-sectional study**  
7  
8  
9

10  
11 Authors: Adeline Beaumont<sup>1</sup>, Cécile Durand<sup>1</sup>, Martine Ledrans<sup>1</sup>, Valérie Schwoebel<sup>1</sup>, Harold Noel<sup>1</sup>,  
12 Yann Le Strat<sup>1</sup>, Donatien Diulius<sup>2</sup>, Léa Colombain<sup>3</sup>, Marie Médus<sup>3</sup>, Philippe Gueudet<sup>4</sup>, Damien Mouly<sup>1</sup>,  
13 Hugues Aumaître<sup>3</sup>  
14  
15

16  
17 <sup>1</sup> Santé publique France, the national public health agency, Saint-Maurice, France

18  
19 <sup>2</sup> Agence Régionale de Santé (ARS) Occitanie, Délégation départementale des Pyrénées-Orientales,  
20 Perpignan, France  
21

22 <sup>3</sup> Centre Hospitalier de Perpignan, Service des Maladies Infectieuses et Tropicales, Perpignan, France

23  
24 <sup>4</sup> Centre Hospitalier de Perpignan, Laboratoire de biochimie et de biologie, Perpignan, France  
25

26 Correspondence to Damien Mouly, Santé publique France, the national public health agency, Saint-  
27 Maurice, France; damien.mouly@santepubliquefrance.fr  
28  
29

30 Word count: 3,819 words  
31  
32  
33  
34  
35  
36  
37  
38  
39  
40  
41  
42  
43  
44  
45  
46  
47  
48  
49  
50  
51  
52  
53  
54  
55  
56  
57  
58  
59  
60

## ABSTRACT

**Objectives** We aimed to assess the level of prior SARS-CoV-2 infection in socially deprived neighbourhoods after the first wave of the pandemic, and to identify factors associated with seropositivity.

**Design** A cross-sectional study.

**Setting** Three socially deprived neighbourhoods of the city of Perpignan, in the south of France, where large settled Roma communities live.

**Participants** People aged 6 years old or over, living in the study area. 700 people were included in the study using two-stage stratified sampling design.

**Interventions** The study included a questionnaire and SARS-CoV-2 antibody testing by the Roche Elecsys® immunoassay between 29 June and 17 July 2020.

**Primary and secondary outcome measures** SARS-CoV-2 antibody seroprevalence was estimated from weighted data. Associated factors and reported symptoms were investigated using univariable and multivariable logistic regressions.

**Results** The seroprevalence of anti-SARS-CoV-2 antibodies was 35.4% (95% CI 30.2 to 41.0). People aged 15-64 years old had increased odds of being seropositive than those aged 65 years or over. Obese people had higher odds of being seropositive (adjusted Odds Ratio (aOR)=2.0, 95% CI 1.1 to 3.8). The odds of being seropositive was higher in households with clinical COVID-19 cases (One case: aOR=2.5, 95% CI 1.3 to 5.0 ; Several cases: aOR=6.9, 95% CI 3.1 to 15.2). In the neighbourhood with the highest measured seroprevalence, people living in a dwelling with 1-2 rooms had higher odds of being seropositive than those living in a 4-room house (aOR=2.8, 95% CI 1.2 to 6.3). Working during the lockdown was associated with lower odds of being seropositive (aOR=0.2, 95% CI 0.03 to 1.0).

**Conclusion** Transmission of the SARS-COV-2 virus in this vulnerable population was very high during the COVID-19 pandemic's first wave. Our results highlight the need to strengthen and adapt preventive measures taking into account all social determinants of health, especially housing conditions.



## Strengths and limitations of this study

- We examined prevalence of SARS-CoV-2 antibodies and associated environmental and behavioural factors in a socially deprived population which is difficult to access.
- A strong collaboration with mediators from the study population for the questionnaire design and the recruitment allowed a better participation of the population in the survey.
- Collection of socioeconomic information was restricted to neighbourhood of residence and housing for reasons of acceptability by the participants.
- Preventive behaviours and compliance with barrier measures were not studied in our analysis due to probable changes in behaviour during the lockdown.
- Men and children were underrepresented in the study sample.

## INTRODUCTION

With the emergence of COVID-19 and the resulting pandemic, questions about social inequalities in health during the current crisis have been raised<sup>1-4</sup>. Many health issues are involved, including inequalities in exposure to the SARS-CoV-2 virus, in the severity of the COVID-19 disease, and in access to healthcare<sup>1 4-6</sup>. These concerns are all the more important given that these health inequalities are often cumulative<sup>7</sup>, leading to a marked risk of increased social deprivation in vulnerable populations<sup>3 5 8</sup>. Furthermore, lockdowns implemented in many countries have exacerbated pre-existing health inequalities<sup>1 5 9 10</sup>.

During the ongoing epidemic, special attention has been given to the some 10,000 residents living in three of the poorest neighbourhoods (Haut-Vernet, Nouveau Logis and Saint-Jacques) in France. Located in the city of Perpignan (120,000 inhabitants, Occitania region), the employment rate is very low in these neighbourhoods, with only 25 to 30% of 15-64 year olds being employed<sup>11</sup>. Roma communities, calling themselves "*gitans*" (gypsies), make up a large part of the population of the neighbourhoods where they have settled for several generations. They share commonalities in lifestyle and culture, with the roles of family and religion being especially important. In Europe, Roma communities have lower education levels and higher unemployment rates than the general public. They often have poorer living conditions and commonly face social exclusion<sup>12</sup>. Furthermore, their health literacy level is low. They have their own perception of health and sickness. Sickness must have visible and tangible consequences for them to recognise it and act accordingly<sup>13</sup>. Moreover, they have a poorer health status than that of the general population and face greater barriers to accessing healthcare<sup>14-16</sup>.

The first wave of the COVID-19 pandemic hit France at the beginning of 2020, leading to a national lockdown between 17 March and 11 May 2020. After the first positive case in Perpignan was detected using RT-PCR on 11 March 2020, the epidemic progressed rapidly in the city. On 20 March 2020, there were 47 confirmed cases in all the Pyrénées-Orientales 'department' (administrative area larger than a district but smaller than a region) (475,000 inhabitants) where Perpignan is located. On the same day, the intensive care unit in Perpignan hospital reported 19 people hospitalised and 5 deaths. An analysis by the hospital's infectious and tropical diseases unit of all those diagnosed positive indicated that most of the patients were living in the three neighbourhoods described above. In order to control the situation, a curfew was implemented throughout the city beginning 21 March 2020 and accommodation facilities were offered to facilitate isolating positive cases and persons the latter had been in contact with. Outpatient medical centres were rapidly opened in the city's most affected neighbourhoods to provide care to clinical cases and to prevent the spread of the virus in less impacted

1  
2  
3 neighbourhoods. Specific surveillance based on data from these centres was also set up to monitor the  
4 evolution of the epidemic<sup>17</sup>. The mobilisation of various health and local actors ensured the swift  
5 dissemination of specific prevention information to the population throughout the first wave. On 1  
6 May 2020, the epidemic had largely dissipated and two months after the lockdown, viral circulation  
7 was close to zero in Perpignan.  
8  
9

10  
11 In this context, we conducted a seroprevalence study of anti-SARS-CoV-2 antibodies in Perpignan  
12 (SCoPe) in the three neighbourhoods described above to estimate the level of prior infection during  
13 the first epidemic wave. In addition, we analysed environmental and behavioural factors in order to  
14 identify factors associated with increased viral circulation.  
15  
16  
17

## 18 19 **METHODS**

### 20 21 **Study design and participants**

22 Seroprevalence of Covid-19 in Perpignan (SCoPe) is a cross-sectional seroprevalence survey of a sample  
23 of the population living in three neighbourhoods (Saint-Jacques (neighbourhood A), Haut-Vernet  
24 (neighbourhood B) and Nouveau Logis (neighbourhood C)) in the city of Perpignan (Figure 1). It was  
25 conducted between 29 June and 17 July 2020.  
26  
27  
28  
29  
30

31 The limits of neighbourhoods A and B were demarcated using data from the French National Institute  
32 of Statistics and Economic Studies (INSEE), and neighbourhood C from city data (priority  
33 neighbourhood for social actions).  
34  
35  
36

37 As sampling frames were unavailable for inhabitants or dwellings, we chose a two-stage random  
38 sampling process (households, inhabitants) stratified by neighbourhood. The field investigators criss-  
39 crossed each neighbourhood to select households for potential participation by systematic sampling  
40 from a predefined route and sampling interval generated by the research team. In a second step, we  
41 randomly selected at least one person in each household using the next-birthday method<sup>18</sup>. The  
42 number of selected persons was predetermined according to the number of eligible persons in the  
43 household: one if 2-3 eligible persons, two if 3-4 persons, three if 5-6 persons and four if 7 or over  
44 persons (see: online supplemental materials - Survey procedure and logistics). Recruitment was carried  
45 out by teams of field investigators comprising members of the Roma community and local social  
46 workers.  
47  
48  
49  
50  
51  
52  
53

54 Individuals were eligible if they were 6 years old or over, had resided in the study area between 1  
55 January 2020 and the survey date, were physically able to move to one of the study's five purpose-  
56 built survey centres, and were able to answer the survey questionnaire.  
57  
58  
59  
60

1  
2  
3 Participants were referred to the neighbourhood's survey centre, where physicians used a  
4 standardized questionnaire in French - specifically designed for SCoPe - to collect information on the  
5 following: socio-demographic characteristics, medical conditions associated with the risk of severe  
6 COVID-19<sup>19</sup>, occurrence of symptoms suggestive of COVID-19 and healthcare seeking behaviour since  
7 24 February 2020, characteristics of both the household and the housing the participant lived in during  
8 the first lockdown, knowledge of COVID-19 prevention measures, and behaviours during the first  
9 lockdown (see: online supplemental materials - Questionnaire). Members of the Roma community  
10 were not identified in the questionnaire because of the prohibition of collection of ethnic statistics in  
11 France. BMI was calculated by measuring height and weight and was categorised according to standard  
12 cut-off points for obesity ( $BMI \geq 30 \text{ kg/m}^2$ )<sup>19</sup>. Other quantitative variables (age, number of rooms,  
13 number of clinical COVID-19 cases) were categorised from the results of the univariable analysis. A  
14 blood sample was collected by venepuncture for each participant: 3.5 ml for those aged 18 years old  
15 and over, and 600  $\mu\text{l}$  for those aged 6-17 years old.

16  
17  
18 The study protocol was approved by a French ethics committee (*Comité de Protection des Personnes*  
19 *Sud Est II*, Lyon, 2020-A01828-31). All participants were informed about the processing of personal  
20 data and of their rights. All gave their prior oral consent to participate. For those under 18 years of  
21 age, a parent or legal guardian provided consent.

### 22 23 24 25 26 27 28 29 30 31 32 33 **Laboratory analysis**

34  
35 Samples were stored locally for a maximum of 12 hours at less than 5 degrees before being transferred  
36 to the laboratory at Perpignan hospital.

37  
38 Serological tests were performed using Elecsys Anti-SARS-CoV-2<sup>20</sup>, an immunoassay for *in vitro*  
39 qualitative detection of immunoglobulin M (IgM) and immunoglobulin G (IgG) antibodies against the  
40 SARS-CoV-2 spike (S) protein in serum. Its sensitivity is 99.5% (95% CI 97 to 100) at  $\geq 14$  days after PCR  
41 confirmation. Overall specificity is 99.8% (95% CI 99.69 to 99.88)<sup>20</sup>.

### 42 43 44 45 46 47 48 49 50 51 52 53 **Statistical analysis**

54  
55 SCoPe's estimations take into account the sampling design components (stages, sampling weights,  
56 stratification). Data were weighted by the inverse of the probability of selection (sampling weight) and  
57 adjusted for the age and sex in each neighbourhood from data of selected persons who declined to  
58 participate in the study, and from post-stratification using data from the most recent population  
59 census (2017).

60  
A person was defined seropositive if anti-SARS-CoV-2 antibodies (IgM or IgG) were detected by the  
immunoassay. Seroprevalence (i.e., the proportion of seropositive individuals) was estimated with a

1  
2  
3 95% confidence interval (95% CI). Association of seroprevalence with the neighbourhood, other  
4 individual characteristics and reported symptoms was preliminary tested by univariable analysis with  
5 Rao-Scott  $\chi^2$  test. Factors associated with seropositivity were then analysed using a multivariable  
6 logistic regression taking into account the sampling design. We reported odds ratios (unadjusted and  
7 adjusted) and adjusted Wald F test for significance for each variable. Behaviours during the lockdown  
8 were excluded from the multivariable analysis, except for leaving home to go to work. Age, sex and  
9 neighbourhood were always retained into the multivariable model. For the other variables, a forward  
10 selection procedure was applied and variables with a p-value <0.1 were retained. Interactions were  
11 tested. A p-value <0.05 was considered statistically significant. Data were analysed using Stata V14.2  
12 software (StataCorp, College Station, TX, USA).  
13  
14  
15  
16  
17  
18  
19

### 20 **Patient and public involvement in research**

21  
22  
23 The questionnaire was designed in collaboration with local mediators in order to ensure that it would  
24 be acceptable to the study population and that they could understand it. Then, they implemented the  
25 selection phase of participants and provided them information about the survey. Participants received  
26 their individual results of antibodies anti-SARS-CoV-2 analysis in the week following the samples.  
27  
28  
29

### 30 **RESULTS**

31  
32  
33 Of the total 1117 households initially selected for the study, 853 were visited and invited to participate  
34 (Figure 2). Of the latter, 628 (73.6%) households with 2101 eligible individuals agreed to partake in the  
35 random participant selection stage. The rate of those agreeing to partake in this stage varied between  
36 all three neighbourhoods: 78.7% in neighbourhood A, 48.7% in neighbourhood B and 98.9% in  
37 neighbourhood C. Among the 1248 individuals subsequently selected at random from the 2101 who  
38 were eligible, 700 (56.1%) went to the survey centres and were included in the analysis (i.e., study  
39 population): 312 from neighbourhood A (48.4%), 173 from neighbourhood B (70.0%) and 215 from  
40 neighbourhood C (60.4%).  
41  
42  
43  
44  
45  
46

47 A total of 287 men (41.0%) and 413 women (59.0%) participated in the study. Among all participants,  
48 117 (16.7%) were aged between 6 and 19 years, 468 (66.9%) between 20 and 64 years, and 115 (16.4%)  
49 were aged 65 years or over. After weighting data, men and children were under-represented.  
50 Therefore, post-stratification adjustment was applied.  
51  
52  
53  
54  
55  
56  
57  
58  
59  
60

## Study population

After post-stratification, females accounted for 50.4% of the study population. One third (34.3%) of the population was aged between 6 and 19 years old, 53.7% between 20 and 64 years old, while 12.0% were 65 years old or over.

Obesity prevalence was 40.7% (95% CI 35.8 to 45.8): 43.5% (95% CI 38.9 to 48.3) in adults ( $\text{BMI} \geq 30 \text{ kg/m}^2$ ) and 34.0% (95% CI 22.2 to 48.2) in those aged 6-17 years old (International Obesity Task Force (IOTF) ;  $\text{BMI} \geq \text{IOTF-30}$  cut-off points). Fifteen percent (95% CI 13.0 to 17.3) of the study population reported having hypertension, 7.0% (95% CI 5.5 to 8.8) heart disease, 9.4% (95% CI 7.7 to 11.4) were being treated for diabetes, 5.5% (95% CI 4.0 to 7.7) had asthma, while 4.9% (95% CI 3.7 to 6.6) had (an)other chronic respiratory disease(s).

The majority of those in neighbourhood A were living in an apartment (71.5%, 95% CI 64.6 to 77.6), while the majority of people in neighbourhoods B and C were living in a house (73.9%, 95% CI 62.8 to 82.6, and 83.9%, 95% CI 79.0 to 87.8, respectively). The number of people per room (except the living room) in each home was greater than one for 75.3% (95% CI 69.9 to 80.1) of people living in neighbourhood A, for 55.5% (95% CI 46.9 to 63.7) in neighbourhood B and for 80.5% (95% CI 75.8 to 84.6) in neighbourhood C. Detailed characteristics by neighbourhood as described in online supplementary table S1.

## Seroprevalence

Overall seroprevalence was estimated at 35.4% (95% CI 30.2 to 41.0) for all three neighbourhoods. It was significantly higher in neighbourhood A (46.7%, 95% CI 39.0 to 54.7) than in neighbourhoods B and C (13.9%, 95% CI 8.2 to 22.6, and 17.1%, 95% CI 13.0 to 22.2, respectively).

## Symptoms during the study period

Among seropositive people, 21.7% (95% CI 14.1 to 31.8) reported no symptoms suggestive of COVID-19 during the study period (from 24 February 2020 to the survey date). One in seven (14.6%, 95% CI 9.5 to 21.9) of those who reported no symptoms were tested seropositive. Seropositive people mostly reported unusual fatigue (58.9%, 95% CI 48.9 to 68.2), a headache (51.7%, 95% CI 42.4 to 60.9), ageusia/anosmia (49.8%, 95% CI 40.2 to 59.4), a fever or a feeling of having a fever (49.1%, 95% CI 40.6 to 57.6), a cough (46.4%, 95% CI 37.5 to 55.5) and myalgia (45.7%, 95% CI 37.4 to 54.3).

There was a significant positive association between seropositivity and symptoms (Odds Ratio (OR)=8.1, 95% CI 4.5 to 14.6,  $p < 0.001$ ). Ageusia/anosmia were the symptoms most strongly associated with seropositivity (OR=14.8, 95% CI 7.9 to 27.7,  $p < 0.001$ ), with positive and negative predictive values

1  
2  
3 of 81.3% (95% CI 71.5 to 88.3) and 77.3% (95% CI 71.4 to 82.4), respectively. All other symptoms were  
4 also significantly associated with seropositivity, except for rhinorrhea (Figure 3).  
5  
6

### 7 **Healthcare seeking behaviours during the study period**

8

9  
10 During the study period, 15.8% (95% CI 11.3 to 21.6) of symptomatic people consulted a COVID-19  
11 centre when symptoms occurred and 9.6% (95% CI 6.6 to 13.6) had a RT-PCR test (positive PCR=29.0%).  
12 Specifically, 41.8% of seropositive participants had had a positive RT-PCR test result.  
13  
14

15 Among seropositive participants, 7.9% (95% CI 4.6 to 13.2) had been hospitalised during the study  
16 period, almost all having had medical conditions associated with severe COVID-19 (89.3%).  
17  
18

### 19 **Factors associated with seropositivity**

20

21  
22 In the univariable analysis (Table 1), people aged 65 years or over were associated with lower odds of  
23 being seropositive ( $p < 0.001$ ). No significant difference was observed between males and females  
24 regarding the odds of being seropositive. Obese people had higher odds of being seropositive (OR=2.0,  
25 95% CI 1.3 to 3.2). The presence of one (OR=3.0, 95% CI 1.8 to 5.2) or more (OR=7.8, 95% CI 4.0 to  
26 15.2) clinical COVID-19 cases in the household was associated with increased odds of being  
27 seropositive. People living in a dwelling with three or fewer rooms (1-2 rooms: OR=2.1, 95% CI 1.2 to  
28 3.8 ; 3 rooms: OR=2.2, 95% CI 1.3 to 3.9) had higher odds of being seropositive. The proportion of  
29 seropositive people increased with the number of people per room in the dwelling ( $p = 0.001$ ). People  
30 who worked during the lockdown had reduced odds of being seropositive (OR=0.1, 95% CI 0.02 to 0.5).  
31 Furthermore, people who reported leaving their home once a week or less for walks during the  
32 lockdown had lower odds of being seropositive than people who went out every day or almost every  
33 day (OR=0.2, 95% CI 0.1 to 0.7).  
34  
35  
36  
37  
38  
39  
40  
41  
42  
43  
44  
45  
46  
47  
48  
49  
50  
51  
52  
53  
54  
55  
56  
57  
58  
59  
60



Table 1 - Factors associated with SARS-CoV-2 seropositivity: univariable analysis

|                                                                   | Total number | Seroprevalence (%; 95% CI) <sup>1</sup> | Unadjusted odds ratio (OR, 95% CI) <sup>2</sup> | P-value |
|-------------------------------------------------------------------|--------------|-----------------------------------------|-------------------------------------------------|---------|
| <b>Overall</b>                                                    | <b>700</b>   | <b>35.4% (30.2 to 41.0)</b>             | -                                               | -       |
| <b>Sex</b>                                                        |              |                                         |                                                 | 0.119   |
| Male                                                              | 287          | 31.5% (24.2 to 40.0)                    | 1 (ref)                                         |         |
| Female                                                            | 413          | 39.2% (33.1 to 45.6)                    | 1.4 (0.92 to 2.1)                               | 0.119   |
| <b>Age (years)</b>                                                |              |                                         |                                                 | <0.001  |
| 6-14                                                              | 60           | 33.9% (20.0 to 51.3)                    | 3.0 (1.2 to 7.4)                                | 0.019   |
| 15-19                                                             | 57           | 50.4% (35.5 to 65.2)                    | 5.9 (2.6 to 13.3)                               | <0.001  |
| 20-64                                                             | 468          | 36.1% (30.9 to 41.8)                    | 3.3 (1.8 to 6.0)                                | <0.001  |
| ≥ 65                                                              | 115          | 14.7% (8.9 to 23.2)                     | 1 (ref)                                         |         |
| <b>Obesity<sup>3</sup></b>                                        |              |                                         |                                                 | 0.002   |
| No                                                                | 368          | 28.7% (22.4 to 35.8)                    | 1 (ref)                                         |         |
| Yes                                                               | 315          | 44.9% (36.6 to 53.4)                    | 2.0 (1.3 to 3.2)                                | 0.002   |
| <b>Other medical conditions<sup>4</sup></b>                       |              |                                         |                                                 | 0.744   |
| No                                                                | 401          | 36.4% (29.7 to 43.5)                    | 1 (ref)                                         |         |
| Yes: one                                                          | 161          | 34.0% (25.7 to 43.4)                    | 0.90 (0.56 to 1.5)                              | 0.67    |
| Yes: several                                                      | 116          | 39.4% (29.3 to 50.6)                    | 1.1 (0.66 to 2.0)                               | 0.633   |
| <b>Clinical COVID-19 cases in the household<sup>5</sup></b>       |              |                                         |                                                 | <0.001  |
| No                                                                | 437          | 18.6% (14.3 to 23.7)                    | 1 (ref)                                         |         |
| 1 person                                                          | 159          | 40.9% (30.7 to 51.9)                    | 3.0 (1.8 to 5.2)                                | <0.001  |
| >1 person                                                         | 104          | 64.0% (49.5 to 76.2)                    | 7.8 (4.0 to 15.2)                               | <0.001  |
| <b>Number of rooms</b>                                            |              |                                         |                                                 | 0.006   |
| 1-2 rooms                                                         | 141          | 43.0% (32.4 to 54.2)                    | 2.1 (1.2 to 3.8)                                | 0.011   |
| 3 rooms                                                           | 185          | 43.9% (34.3 to 54.1)                    | 2.2 (1.3 to 3.9)                                | 0.005   |
| ≥ 4 rooms                                                         | 366          | 26.2% (19.6 to 34.0)                    | 1 (ref)                                         |         |
| <b>Number of people per room (except living room)<sup>6</sup></b> |              |                                         |                                                 | 0.001   |
| > 1 person                                                        | 435          | 40.0% (33.5 to 46.9)                    | 4.0 (2.0 to 8.2)                                | <0.001  |
| 1 person                                                          | 129          | 27.6% (19.1 to 38.2)                    | 2.3 (1.1 to 5.0)                                | 0.037   |
| < 1 person                                                        | 128          | 14.3% (7.9 to 24.6)                     | 1 (ref)                                         |         |
| <b>At least one child in the household</b>                        |              |                                         |                                                 | 0.116   |
| No                                                                | 306          | 29.6% (23.0 to 30.9)                    | 1 (ref)                                         |         |
| Yes                                                               | 387          | 37.9% (37.2 to 45.6)                    | 1.5 (0.9 to 2.3)                                | 0.116   |
| <b>Went out for work during the lockdown</b>                      |              |                                         |                                                 | 0.006   |
| No                                                                | 670          | 36.5% (31.1 to 42.2)                    | 1 (ref)                                         |         |
| Yes                                                               | 30           | 5.4% (1.1 to 22.2)                      | 0.10 (0.02 to 0.51)                             | 0.006   |
| <b>Went out for a walk during the lockdown</b>                    |              |                                         |                                                 | 0.001   |
| Never                                                             | 559          | 37.5% (32.0 to 43.4)                    | 1.2 (0.53 to 2.8)                               | 0.644   |
| Sometimes (≤1 time a week)                                        | 51           | 9.7% (4.2 to 20.8)                      | 0.22 (0.07 to 0.71)                             | 0.012   |
| Almost every day                                                  | 87           | 33.0% (18.0 to 52.5)                    | 1 (ref)                                         |         |

<sup>1</sup> Seroprevalence estimated from weighted data

<sup>2</sup> Unadjusted odds ratio with corresponding 95% confidence intervals and p-values from univariable logistic regressions

<sup>3</sup> For those aged 18 years or older: BMI≥30kg/m<sup>2</sup>; for those aged 6-17 years: BMI≥IOTF-30 cut-off points



1  
2  
3 <sup>4</sup> Other medical conditions including: Asthma, other respiratory diseases, hypertension, heart disease, treated diabetes,  
4 treated cancer (excluding hormone therapy), HIV and immunodeficiency, chronic liver disease, chronic kidney disease,  
5 neuromuscular diseases  
6

7 <sup>5</sup> Clinical COVID-19 cases in the household: Number of people, except the respondent, with clinical signs of covid-19 (cough,  
8 fever), a positive RT-PCR test or who were consulted for suspected covid-19 since 24 February 2020  
9

10 <sup>6</sup> Living rooms were excluded, except for single people, in order to measure the potential for isolation in the dwellings.  
11 Indicator calculated: ((number of people) / number of rooms -1]).  
12

13 In the multivariable analysis (Table 2), the association between seropositivity and the presence of  
14 clinical cases in the household remained strong after adjusting for other factors (one person: adjusted  
15 odds ratio (aOR)=2.5, 95% CI 1.3 to 5.0 ;  $\geq 2$  persons: aOR=6.9, 95% CI 3.1 to 15.2). People aged 15-19  
16 years (aOR 9.1, 95% CI 2.8 to 29.8) and 20-64 years (aOR=4.5, 95% CI 2.0 to 10.1) had higher odds of  
17 being seropositive than those aged 65 years or over. Females had increased odds of being seropositive  
18 than males (aOR=1.8, 95% CI 1.0 to 3.3). Seropositivity was significantly associated with obesity  
19 (aOR=2.0, 95% CI 1.1 to 3.8) and other medical conditions (aOR=3.2, 95% CI 1.6 to 6.3). There was a  
20 significant interaction between the neighbourhood and the number of rooms in the dwelling  
21 ( $p=0.004$ ). People living in a one- or two-room dwelling in neighbourhood A had higher odds of being  
22 seropositive than those living in a dwelling with four or more rooms (aOR=2.8, 95% CI 1.2 to 6.3).  
23 Working during lockdown remained associated with decreased odds of being seropositive (aOR=0.2,  
24 95% CI 0.03 to 1.0).  
25  
26  
27  
28  
29  
30  
31  
32  
33  
34  
35  
36  
37  
38  
39  
40  
41  
42  
43  
44  
45  
46  
47  
48  
49  
50  
51  
52  
53  
54  
55  
56  
57  
58  
59  
60

Table 2 - Factors associated with SARS-CoV-2 seropositivity: multivariable analysis

|                                                             | Adjusted Odds Ratio (aOR, 95% CI) <sup>1</sup> | P-value |
|-------------------------------------------------------------|------------------------------------------------|---------|
| <b>Sex</b>                                                  |                                                | 0.034   |
| Male                                                        | 1 (ref)                                        |         |
| Female                                                      | 1.8 (1.0 to 3.3)                               | 0.034   |
| <b>Age (years)</b>                                          |                                                | <0.001  |
| 6-14                                                        | 1.8 (0.53 to 6.1)                              | 0.344   |
| 15-19                                                       | 9.1 (2.8 to 29.8)                              | <0.001  |
| 20-64                                                       | 4.5 (2.0 to 10.1)                              | <0.001  |
| ≥ 65                                                        | 1 (ref)                                        |         |
| <b>Obesity<sup>2</sup></b>                                  |                                                | 0.024   |
| No                                                          | 1 (ref)                                        |         |
| Yes                                                         | 2.0 (1.1 to 3.8)                               | 0.024   |
| <b>Other medical conditions<sup>3</sup></b>                 |                                                | 0.004   |
| No                                                          | 1 (ref)                                        |         |
| Yes: one                                                    | 1.1 (0.57 to 2.0)                              | 0.863   |
| Yes: several                                                | 3.2 (1.6 to 6.3)                               | 0.001   |
| <b>Clinical COVID-19 cases in the household<sup>4</sup></b> |                                                | <0.001  |
| No                                                          | 1 (ref)                                        |         |
| 1 person                                                    | 2.5 (1.3 to 5.0)                               | 0.007   |
| >1 person                                                   | 6.9 (3.1 to 15.2)                              | <0.001  |
| <b>Went out for work during the lockdown</b>                |                                                | 0.048   |
| No                                                          | 1 (ref)                                        |         |
| Yes                                                         | 0.18 (0.03 to 1.0)                             | 0.048   |
| <b>Number of rooms by neighbourhood<sup>5</sup></b>         |                                                | 0.007   |
| <b>Neighbourhood A</b>                                      |                                                |         |
| 1-2                                                         | 2.8 (1.2 to 6.3)                               | 0.016   |
| 3                                                           | 2.2 (1.0 to 5.0)                               | 0.064   |
| ≥ 4                                                         | 1 (ref)                                        |         |
| <b>Neighbourhood B</b>                                      |                                                |         |
| 1-2                                                         | 1.5 (0.3 to 6.4)                               | 0.594   |
| 3                                                           | 0.23 (0.04 to 1.2)                             | 0.075   |
| ≥ 4                                                         | 1 (ref)                                        |         |
| <b>Neighbourhood C</b>                                      |                                                |         |
| 1-2                                                         | 0.58 (0.22 to 1.5)                             | 0.262   |
| 3                                                           | 2.3 (0.91 to 5.9)                              | 0.078   |
| ≥ 4                                                         | 1 (ref)                                        |         |

<sup>1</sup> Adjusted odds ratio with corresponding 95% confidence intervals and p-values from multivariable logistic regression.

Analysis performed on 655/700 sampled individuals.

<sup>2</sup> For those aged 18 years or older: BMI≥30kg/m<sup>2</sup>; for those aged 6-17 years: BMI≥IOTF-30 cut-off points

<sup>3</sup> Other medical conditions including: Asthma, other respiratory diseases, hypertension, heart disease, treated diabetes, treated cancer (excluding hormone therapy), HIV and immunodeficiency, chronic liver disease, chronic kidney disease, neuromuscular diseases

<sup>4</sup> Clinical COVID-19 cases in the household: Number of people, except the respondent, with clinical signs of covid-19 (cough, fever), a positive RT-PCR test or who were consulted for suspected covid-19 since 24 February 2020

<sup>5</sup> Model includes an interaction term: number of rooms\*neighbourhood

## DISCUSSION

Our findings from the SCoPe seroprevalence study in three socially deprived neighbourhoods with a large settled Roma community in Perpignan indicate that more than one in three (35.4%) people developed antibodies against SARS-CoV-2 during the first months of the COVID-19 epidemic. In comparison, estimates for the general population in May 2020 indicated an antibody prevalence of 1.9% in the Occitania region (where Perpignan is situated) and less than 5% in France and Spain (Perpignan is located very close to the Spanish border)<sup>21 22</sup>.

Although the proportion of asymptomatic SARS-CoV-2 infections varies greatly from one study to another, the proportion we found (21.7%) was comparable with the results of two meta-analyses (20%, 95% CI 17 to 25)<sup>23</sup> (17%, 95% CI 14 to 20)<sup>24</sup>. The specificity of ageusia/anosmia symptoms was found very high, although this could not be confirmed by a temporal analysis which was not possible in this cross-sectional study. Such a high specificity has already been observed in numerous other studies<sup>25</sup>. It would be useful for developing a strategy for early diagnosis of COVID-19 and self-isolation.

Lower seroprevalence was reported among study participants aged 65 years and over. This may partially be explained by a result from a qualitative study simultaneously conducted with SCoPe which found that this older population went outdoors less frequently and had fewer social contacts during the first wave of the epidemic thanks to the very protective stance adopted by the local community<sup>26</sup>. In addition, females were more likely to be seropositive in the multivariable analysis. The associations between seropositivity and age and between seropositivity and sex differ between studies, although several have found a lower seroprevalence among older people, particularly in France<sup>21 26 27</sup>. The fact that few seroprevalence studies have been conducted to date in a similar context (high level of infection, socially deprived neighbourhood) could explain these differences.

Our results showed that obese people had higher seroprevalence of SARS-CoV-2 antibodies independently from other factors. This is consistent with the findings of a meta-analysis of 20 published studies on the subject (OR=1.46, 95% CI 1.30 to 1.65)<sup>28</sup>. Obesity has been associated with low socioeconomic status<sup>29</sup>. The association we found between obesity and seropositivity may be explained by potential confounders linked to unfavourable socioeconomic conditions. SCoPe did not comprehensively measure these conditions for reasons of study acceptability. Metabolic and immune dysfunction and inflammatory mechanisms may be implicated in the clinical aggravation of COVID-19 in obese people<sup>30-32</sup>. These mechanisms might also be involved in increasing the risk of infection,

1  
2  
3 although this association is less well established. Prolonged viral shedding in obese people, something  
4 already seen for influenza<sup>33</sup>, may also occur for SARS-CoV-2 and could play a role in the spread of the  
5 virus in families where obesity is prevalent.  
6  
7

8  
9 Our study also confirms findings elsewhere that the risk of transmission is greater when a clinical case  
10 is present in the same household<sup>21 22</sup>. Working outside the home during the first lockdown was  
11 associated with a lower risk of seropositivity. This result may reflect a higher socioeconomic status of  
12 people who worked. Other hypotheses (compliance with barriers measures, healthy worker effect...) could  
13 be formulated to explain this result, but cannot be further explored without additional data.  
14  
15  
16

17  
18 In our study, seroprevalence was higher for people living in crowded housing, and after adjusting for  
19 other factors, small dwelling size was a significant associated factor, but only in neighbourhood A. This  
20 result was also found in other French studies<sup>21 34</sup>. In addition, living conditions - not analysed in our  
21 study - may also explain the higher seroprevalence in this particular neighbourhood. Population  
22 density, a factor associated with higher seroprevalence elsewhere<sup>21 22</sup>, was higher in neighbourhood A  
23 than in both other neighbourhoods. The majority of accommodation in neighbourhood A comprises  
24 flats, and almost one-quarter of all dwellings are less than 40m<sup>2</sup> <sup>35</sup>. Insalubrity was also very present in  
25 neighbourhood A, which is one of the priority areas in an ongoing national urban renewal programme  
26 <sup>36</sup>. Accordingly, ventilation problems, lack of outdoor space and overcrowding may explain the higher  
27 risk of contamination. In general, the community-based lifestyle of the Roma population may also have  
28 increased the risk of contact with a clinical COVID-19 case.  
29  
30  
31  
32  
33  
34  
35  
36  
37  
38

39  
40 Overall, we achieved a 56% participation rate in this difficult-to-reach population thanks to local  
41 mediators and contacts, whose collaboration was essential. Furthermore, despite the unavailability of  
42 sampling frames, the study was designed and implemented very quickly after the first wave ended,  
43 thanks to careful training and supervision of the interviewers throughout the field survey. This speed  
44 of implementation was necessary given the uncertainties surrounding the duration of SARS-CoV-2 IgG  
45 antibodies after infection.  
46  
47  
48  
49

50  
51 Our study has several limitations. First, it was conducted 4 months after the first wave ended, leading  
52 to possible recall bias in the reporting of symptoms. The assessment of behaviours during lockdown  
53 was very complex because of the fact that their evolution was not measured during the course of the  
54 first wave. It is important to underline that a qualitative study observed a shift in the three  
55 neighbourhoods' awareness of the dangers of COVID-19 following the first deaths, particularly that of  
56 a young woman<sup>26</sup>. The same study observed a substantial improvement in compliance with prevention  
57 measures during the lockdown. This is why the association between these behaviours and  
58  
59  
60

1  
2  
3 seropositivity (except for going out to work) was not studied in our analysis. Second, the systematic  
4 sampling method used to select households made it difficult to estimate the total number of  
5 individuals to approach. Third, although we consider the participation rate to be acceptable in this field  
6 study setting, it was suboptimal and with lower participation by children and men. However, we  
7 accounted for this bias by using post-stratification. We also had difficulties reaching some of the  
8 selected households, despite flyers being placed in letterboxes and several visits. Furthermore,  
9 selection bias may have occurred. More specifically, people with a history of COVID-19 type symptoms  
10 may have been more willing to participate in the study than people with no such history. It is also  
11 possible that people who had been tested positive before the study were less willing to participate.  
12 Incomplete data on reasons for non-response prevented us from further exploring this issue. Finally, a  
13 more in-depth analysis at the household level would be relevant in view of intra-household infections.  
14 However, our study design did not allow for this type of analysis.

15  
16  
17  
18  
19  
20  
21  
22  
23  
24 The high estimated seroprevalence after the first wave of SARS-CoV-2 infection in the three socially  
25 deprived neighbourhoods in the present study confirms the very high vulnerability to COVID-19 of  
26 populations living in socially deprived conditions, and underlines the need for more sophisticated  
27 surveillance and specific disease prevention measures<sup>37</sup>. Additional observations using a sociological  
28 approach, should provide an accurate assessment of the ability of this population to improve their  
29 level of health literacy and to assimilate protective measures. Although underlying mechanisms remain  
30 unclear, our results support previous findings that obese individuals are at higher risk of SARS-CoV-2  
31 infection, and confirm the importance of conducting preventive interventions in this population. This  
32 is especially relevant as future vaccines might be less effective for these people<sup>30 33</sup>. All future  
33 vaccination strategies should be designed to ensure that they are acceptable to this vulnerable  
34 population<sup>38</sup>.

35  
36  
37  
38  
39  
40  
41  
42  
43 The long-term protection of vulnerable populations such as that in the present study who are  
44 particularly exposed to health and environmental crises, must be improved by strengthening specific  
45 prevention and health promotion programmes and reducing social inequalities in health<sup>39</sup>. In this  
46 context, policies against substandard housing have a key role in improving living conditions. Finally,  
47 health strategies can only be successful by ensuring long-term partnerships with organisations and  
48 stakeholders capable of rapid mobilisation in the event of a crisis.

## CONTRIBUTORS

AB: responsible for data analysis, data interpretation, manuscript writing and submission and participated in study design, protocol writing, data collection (coordination) and training of field investigators ; CD: responsible for study design, online questionnaire and participated in protocol writing, data collection (coordination), data analysis, data manuscript writing ; ML: responsible for protocol writing and participated in study design, data collection (coordination), training of field investigators, data interpretation and manuscript writing ; VS: participated in data collection (coordination), training of field investigators, data interpretation and manuscript writing ; HN and YLS: participated in data analysis and manuscript revision ; DD: participated in data collection (coordination) and manuscript revision ; LC and MM: participated in data collection (serology) and manuscript revision ; PG: responsible for serological analysis ; DM: responsible for organising data collection and ethics committee approval and participated in study design, protocol writing, data collection, data interpretation, manuscript writing and submission ; HA: initiated the study, responsible for organising data collection and participated in ethics committee approval, data interpretation and manuscript writing.

## ACKNOWLEDGMENTS

We would like to thank the field-based interviewers, the nursing staff (Centre Hospitalier de Perpignan, Perpignan, France) and Anne Guinard (Santé publique France, the national public health agency, Saint-Maurice, France) who participated in the recruitment phase of the study. We thank Clothilde Hachin (Santé publique France, Saint-Maurice, France) for her support on the study protocol, Séverine Bailleul (Santé publique France, Saint-Maurice, France) for her help during preparation of the study, Gabrielle Jones (Santé publique France, Saint-Maurice, France) for her technical support, and Jude Sweeney (translator/copyeditor) for the English revision.

## FUNDING

This study was done by Perpignan Hospital and Santé publique France, the national public health agency, as part of their missions from the routine institutional funds. Both structures are funded by the French ministry of health.

## COMPETING INTERESTS

None declared

## DATA AVAILABILITY

Anonymised data are available for researchers from the corresponding author, Damien Mouly, on reasonable request.

## ETHICS STATEMENT

The study protocol was approved by a French ethics committee, Comité de Protection des Personnes Sud Est II, Lyon (reference number: 2020-A01828-31).

For peer review only

## REFERENCES

1. Bambra C, Riordan R, Ford J, et al. The COVID-19 pandemic and health inequalities. *J Epidemiol Community Health* 2020;74(11):964-68. doi: 10.1136/jech-2020-214401
2. Chung RY, Dong D, Li MM. Socioeconomic gradient in health and the covid-19 outbreak. *BMJ* 2020;369:m1329. doi: 10.1136/bmj.m1329 [published Online First: 2020/04/03]
3. Shadmi E, Chen Y, Dourado I, et al. Health equity and COVID-19: global perspectives. *Int J Equity Health* 2020;19(1):104. doi: 10.1186/s12939-020-01218-z [published Online First: 2020/06/27]
4. Wang Z, Tang K. Combating COVID-19: health equity matters. *Nat Med* 2020;26(4):458. doi: 10.1038/s41591-020-0823-6 [published Online First: 2020/04/15]
5. DREES. Les inégalités sociales face à l'épidémie de Covid-19. Etat des lieux et perspectives [in French]. Les dossiers de la DREES, 2020:40.
6. Okonkwo NE, Aguwa UT, Jang M, et al. COVID-19 and the US response: accelerating health inequities. *BMJ Evid Based Med* 2020 doi: 10.1136/bmjebm-2020-111426 [published Online First: 2020/06/05]
7. Bajos N, Jusot F, Pailhe A, et al. When lockdown policies amplify social inequalities in COVID-19 infections: evidence from a cross-sectional population-based survey in France. *BMC Public Health* 2021;21(1):705. doi: 10.1186/s12889-021-10521-5 [published Online First: 2021/04/14]
8. Abedi V, Olulana O, Avula V, et al. Racial, Economic, and Health Inequality and COVID-19 Infection in the United States. *J Racial Ethn Health Disparities* 2020:1-11. doi: 10.1007/s40615-020-00833-4 [published Online First: 2020/09/03]
9. Wright L, Steptoe A, Fancourt D. Are we all in this together? Longitudinal assessment of cumulative adversities by socioeconomic position in the first 3 weeks of lockdown in the UK. *J Epidemiol Community Health* 2020;74(9):683-88. doi: 10.1136/jech-2020-214475 [published Online First: 2020/06/07]
10. Gonzalez-Rabago Y, Cabezas-Rodriguez A, Martin U. Social Inequalities in Health Determinants in Spanish Children during the COVID-19 Lockdown. *Int J Environ Res Public Health* 2021;18(8) doi: 10.3390/ijerph18084087 [published Online First: 2021/05/01]
11. Bordet C, Bourniquel C, Flachère M, et al. Quartiers prioritaires de la politique de la ville en Occitanie : les multiples visages de la pauvreté. Insee Dossier Occitanie: Insee Occitanie, 2018:151-55.
12. Parekh N, Rose T. Health inequalities of the Roma in Europe: a literature review. *Cent Eur J Public Health* 2011;19(3):139-42. [published Online First: 2011/10/27]
13. Ramos-Morcillo AJ, Leal-Costa C, Hueso-Montoro C, et al. Concept of Health and Sickness of the Spanish Gypsy Population: A Qualitative Approach. *Int J Environ Res Public Health* 2019;16(22) doi: 10.3390/ijerph16224492 [published Online First: 2019/11/20]
14. Hajioff S, McKee M. The health of the Roma people: a review of the published literature. *J Epidemiol Community Health* 2000;54(11):864-9. doi: 10.1136/jech.54.11.864 [published Online First: 2000/10/12]
15. Cook B, Wayne GF, Valentine A, et al. Revisiting the evidence on health and health care disparities among the Roma: a systematic review 2003-2012. *Int J Public Health* 2013;58(6):885-911. doi: 10.1007/s00038-013-0518-6 [published Online First: 2013/10/08]
16. McFadden A, Siebelt L, Gavine A, et al. Gypsy, Roma and Traveller access to and engagement with health services: a systematic review. *Eur J Public Health* 2018;28(1):74-81. doi: 10.1093/eurpub/ckx226 [published Online First: 2018/01/19]
17. Simac L, Ledrans M, Catelinois O, et al. COVID-19 in the vulnerable population of the Saint-Jacques and Haut-Vernet districts of Perpignan (France): Health surveillance carried out using local data [in French]. *Bull Epidémiol Hebd* 2020(30):590-98.



18. Salmon CT, Nichols JS. The Next-Birthday Method of Respondent Selection. *Public Opinion Quarterly* 1983;47(2):270-76. doi: <https://doi.org/10.1086/268785>
19. Haut Conseil de la santé publique. Avis du 29 octobre 2020 relatif à l'actualisation de la liste des facteurs de risque de forme grave de Covid-19 [in French]. Paris, 2020:34.
20. Muench P, Jochum S, Wenderoth V, et al. Development and Validation of the Elecsys Anti-SARS-CoV-2 Immunoassay as a Highly Specific Tool for Determining Past Exposure to SARS-CoV-2. *J Clin Microbiol* 2020;58(10) doi: 10.1128/JCM.01694-20 [published Online First: 2020/08/05]
21. Warszawski J, Bajos N, Meyer L, et al. In May 2020, 4.5% of the population of metropolitan France had developed antibodies against SARS-CoV-2 - The first results of the EpiCov national survey. *Études et résultats: Drees*, 2020:6.
22. Pollán M, Pérez-Gómez B, Pastor-Barriuso R, et al. Prevalence of SARS-CoV-2 in Spain (ENE-COVID): a nationwide, population-based seroepidemiological study. *Lancet* 2020;396(10250):535-44. doi: 10.1016/s0140-6736(20)31483-5 [published Online First: 2020/07/10]
23. Buitrago-Garcia D, Egli-Gany D, Counotte MJ, et al. Occurrence and transmission potential of asymptomatic and presymptomatic SARS-CoV-2 infections: A living systematic review and meta-analysis. *PLoS Med* 2020;17(9):e1003346. doi: 10.1371/journal.pmed.1003346 [published Online First: 2020/09/23]
24. Byambasuren O, Cardona M, Bell K, et al. Estimating the extent of asymptomatic COVID-19 and its potential for community transmission: Systematic review and meta-analysis. *Official Journal of the Association of Medical Microbiology and Infectious Disease Canada* 2020 doi: 10.3138/jammi-2020-0030
25. Makaronidis J, Mok J, Balogun N, et al. Seroprevalence of SARS-CoV-2 antibodies in people with an acute loss in their sense of smell and/or taste in a community-based population in London, UK: An observational cohort study. *PLoS Med* 2020;17(10):e1003358. doi: 10.1371/journal.pmed.1003358 [published Online First: 2020/10/02]
26. Srocynski M, Yeghicheyan J. Les Gitans de Perpignan face à la Covid-19. Approche qualitative d'un cluster [in French]: CREA-ORS Occitanie, 2021:123.
27. Stringhini S, Wisniak A, Piumatti G, et al. Seroprevalence of anti-SARS-CoV-2 IgG antibodies in Geneva, Switzerland (SEROCoV-POP): a population-based study. *Lancet* 2020;396(10247):313-19. doi: 10.1016/S0140-6736(20)31304-0 [published Online First: 2020/06/15]
28. Popkin BM, Du S, Green WD, et al. Individuals with obesity and COVID-19: A global perspective on the epidemiology and biological relationships. *Obes Rev* 2020;21(11):e13128. doi: 10.1111/obr.13128 [published Online First: 2020/08/28]
29. Vernay M, Malon A, Oleko A, et al. Association of socioeconomic status with overall overweight and central obesity in men and women: the French Nutrition and Health Survey 2006. *BMC Public Health* 2009;9:215. doi: 10.1186/1471-2458-9-215 [published Online First: 2009/07/04]
30. Alberca RW, Oliveira LM, Branco A, et al. Obesity as a risk factor for COVID-19: an overview. *Crit Rev Food Sci Nutr* 2020:1-15. doi: 10.1080/10408398.2020.1775546 [published Online First: 2020/06/17]
31. Goossens GH, Dicker D, Farpour-Lambert NJ, et al. Obesity and COVID-19: A Perspective from the European Association for the Study of Obesity on Immunological Perturbations, Therapeutic Challenges, and Opportunities in Obesity. *Obes Facts* 2020;13(4):439-52. doi: 10.1159/000510719 [published Online First: 2020/08/14]
32. Deschasaux-Tanguy M, Bourhis L, de Lamballerie X, et al. Body weight, body composition and the risk of SARS-CoV-2 infection in a large population-based sample. *J Intern Med* 2021 doi: 10.1111/joim.13364 [published Online First: 2021/07/09]
33. Luzi L, Radaelli MG. Influenza and obesity: its odd relationship and the lessons for COVID-19 pandemic. *Acta Diabetol* 2020;57(6):759-64. doi: 10.1007/s00592-020-01522-8 [published Online First: 2020/04/07]
34. Roederer T, Mollo B, Vincent C, et al. Seroprevalence and risk factors of exposure to COVID-19 in homeless people in Paris, France: a cross-sectional study. *Lancet Public Health* 2021 doi: 10.1016/s2468-2667(21)00001-3 [published Online First: 2021/02/09]

- 1  
2  
3 35. Insee. Logement en 2017 : Recensement de la population - Base infracommunale (IRIS) [in French]:  
4 Insee, 2020.
- 5 36. Ministry of the City, Youth and Sports. Arrêté du 29 avril 2015 relatif à la liste des quartiers  
6 prioritaires de la politique de la ville présentant les dysfonctionnements urbains les plus  
7 importants et visés en priorité par le nouveau programme national de renouvellement urbain  
8 [in French]: JORF n°0106 [NOR: VJSV1508731A]; 2015 [updated 2015 May 8; cited 2021 Jan  
9 20]. Available from: [https://www.legifrance.gouv.fr/loda/id/LEGITEXT000030556555/2020-  
10 08-28/](https://www.legifrance.gouv.fr/loda/id/LEGITEXT000030556555/2020-08-28/) accessed Jan 20 2021.
- 11 37. Burström B, Tao W. Social determinants of health and inequalities in COVID-19. *Eur J Public Health*  
12 2020;30(4):617-18. doi: 10.1093/eurpub/ckaa095 [published Online First: 2020/07/09]
- 13 38. Jackson C, Bedford H, Cheater FM, et al. Needles, Jabs and Jags: a qualitative exploration of barriers  
14 and facilitators to child and adult immunisation uptake among Gypsies, Travellers and Roma.  
15 *BMC Public Health* 2017;17(1):254. doi: 10.1186/s12889-017-4178-y [published Online First:  
16 2017/03/16]
- 17 39. Fernández-Feito A, Pesquera-Cabezas R, González-Cobo C, et al. What do we know about the health  
18 of Spanish Roma people and what has been done to improve it? A scoping review. *Ethn Health*  
19 2019;24(2):224-43. doi: 10.1080/13557858.2017.1315373 [published Online First:  
20 2017/04/12]
- 21  
22  
23  
24  
25  
26  
27  
28  
29  
30  
31  
32  
33  
34  
35  
36  
37  
38  
39  
40  
41  
42  
43  
44  
45  
46  
47  
48  
49  
50  
51  
52  
53  
54  
55  
56  
57  
58  
59  
60

## FIGURES

Figure 1 - Map of the city of Perpignan and the three neighbourhoods studied

Figure 2 – Flow chart of participants

Figure 3 - Association between seropositivity and reporting symptoms

\* Analysis performed on all sampled individuals (n=700) using simple logistic regressions.

For peer review only

1  
2  
3  
4  
5  
6  
7  
8  
9  
10  
11  
12  
13  
14  
15  
16  
17  
18  
19  
20  
21  
22  
23  
24  
25  
26  
27  
28  
29  
30  
31  
32  
33  
34  
35  
36  
37  
38  
39  
40  
41  
42  
43  
44  
45  
46  
47  
48  
49  
50  
51  
52  
53  
54  
55  
56  
57  
58  
59  
60

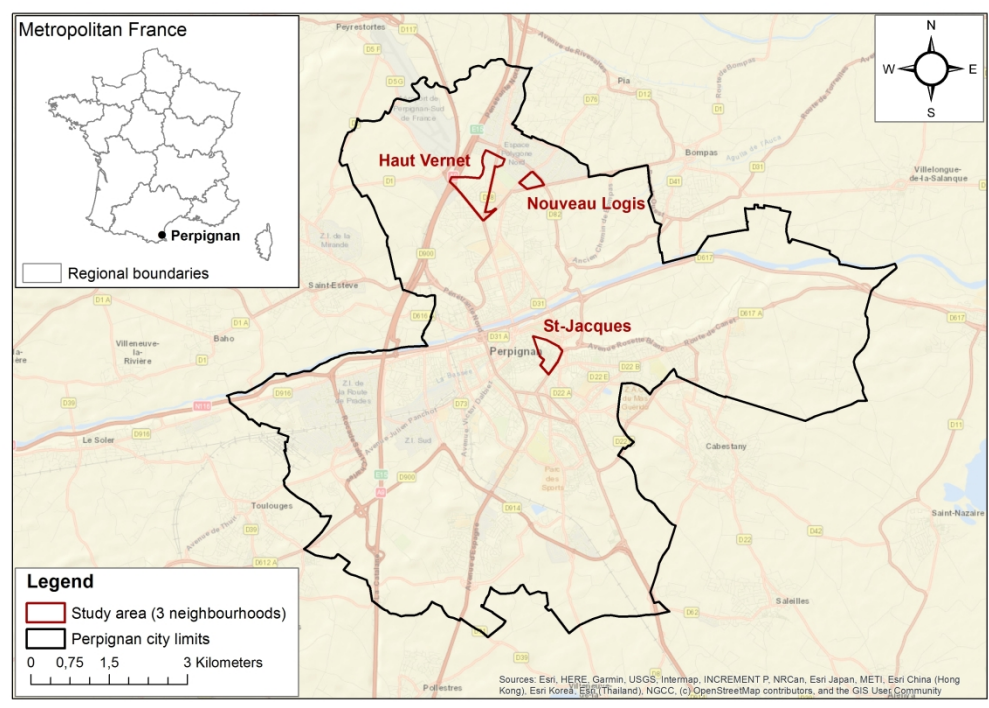

Figure 1 - Map of the city of Perpignan and the three neighbourhoods studied

297x209mm (300 x 300 DPI)

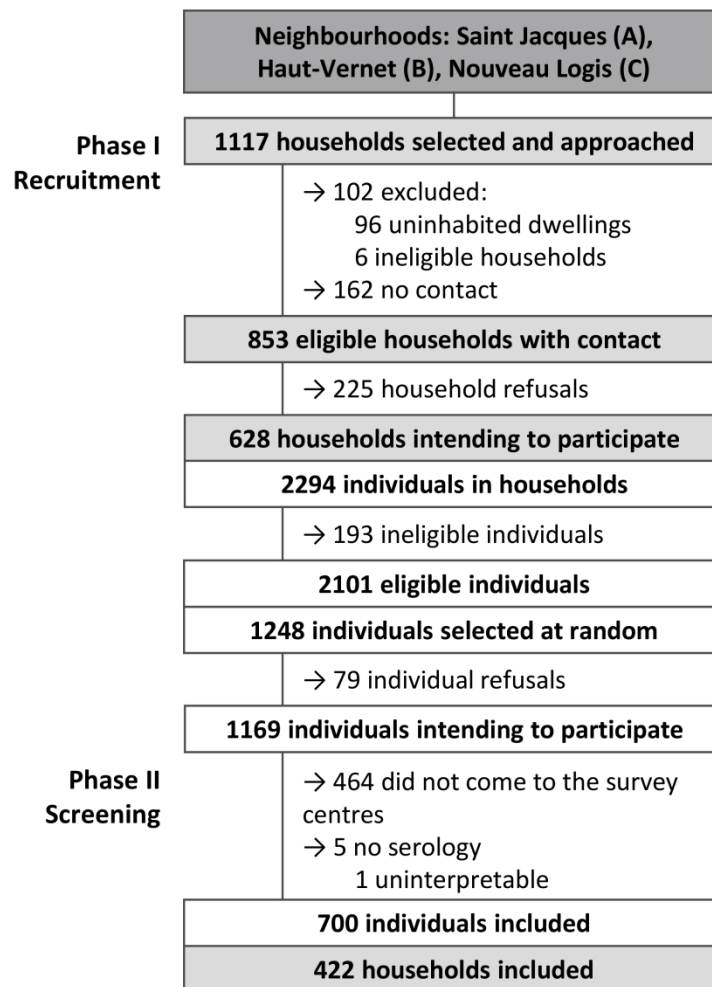

Figure 2 – Flow chart of participants

209x297mm (300 x 300 DPI)

1  
2  
3  
4  
5  
6  
7  
8  
9  
10  
11  
12  
13  
14  
15  
16  
17  
18  
19  
20  
21  
22  
23  
24  
25  
26  
27  
28  
29  
30  
31  
32  
33  
34  
35  
36  
37  
38  
39  
40  
41  
42  
43  
44  
45  
46  
47  
48  
49  
50  
51  
52  
53  
54  
55  
56  
57  
58  
59  
60



Figure 3 - Association between seropositivity and reporting symptoms  
\* Analysis performed on all sampled individuals (n=700) using simple logistic regressions.

## SUPPLEMENTAL MATERIALS

### Survey procedure and logistics

All the interviewers were initially trained in the study method and the use of the survey tools (online questionnaire, household forms, logbooks). They were supervised throughout the survey. In total, the study mobilised almost 80 people.

Local mediators and social workers implemented the selection phase (households and inhabitants) and provided potential participants with information about the survey. For this purpose, they had a map of each neighbourhood describing the starting point and a specific route to be followed. These starting points were defined randomly from a grid of neighbourhood maps as follows: randomly drawing a grid cell and, after assigning a number to each building, randomly choosing one building on that grid cell to be the starting point. The starting direction was also randomly chosen. In neighbourhood A, every 2 out of 5 households were selected, while in neighbourhood B, every 2 out of 3 were selected. In neighbourhood C, all households were selected. These sampling intervals were determined according to the size of the targeted sample, the estimated non-response rate, the number of dwellings in the neighbourhood, and the average number of people per household in the population census. The sampling intervals were then adjusted to take into account field observations during the first days of the survey. The a priori targeted sample size was 1,000 participants, equally distributed among the three neighbourhoods, for an expected prevalence of 10%, a margin of error of 2.5 percentage points and a design effect of 2.

In each selected household, between one and four participants were randomly selected in proportion to the size of the household. The selected inhabitants received information notes and a ticket indicating their name and surname and the fact that they had been selected for participation. They were then invited to visit one of the five centres specifically set up for the survey (2 each in neighbourhoods A and B, 1 in neighbourhood C), and to bring their ticket with them to facilitate their identification and inclusion. All the initially selected households and their inhabitants were monitored using logbooks and forms to record household data. To increase the participation rate, three visits were made at different days and times. When no one was at home, a letter with a phone number was put in the letterbox. People who agreed to participate but who did not visit a survey centre were called back by phone.

In the survey centres, doctors and nurses from the infectious and tropical diseases unit (SMIT) of Perpignan hospital checked the identity of participants, administered a face-to-face questionnaire and took blood samples. Answers to the questionnaire items were entered in real-time online on a secure

1  
2  
3 Voozanoo™ platform. Children under 18 years had to be accompanied by a parent or legal  
4 representative, and participants who did not speak French very well could - if they wished - be  
5 accompanied by a family member or friend who did. The weight and height of the participants were  
6 measured at the time of the questionnaire. A doctor gave individual results to those tested in  
7 July/August 2020.  
8  
9  
10  
11  
12  
13  
14  
15  
16  
17  
18  
19  
20  
21  
22  
23  
24  
25  
26  
27  
28  
29  
30  
31  
32  
33  
34  
35  
36  
37  
38  
39  
40  
41  
42  
43  
44  
45  
46  
47  
48  
49  
50  
51  
52  
53  
54  
55  
56  
57  
58  
59  
60

For peer review only



## Questionnaire

French version / [English translation](#)

Date d'enquête :/ *Survey date*: ..../..../2020

Centre de prélèvement :  St Jacques  
*Test centre*  Haut-Vernet  
 Nouveau logis

Acceptez-vous de participer à cette étude c'est-à-dire de répondre à ce questionnaire et de réaliser un prélèvement de sang ? / *Do you agree to participate in this study, that is to say, to answer this questionnaire and to have a blood sample taken?*

oui / *yes*  non / *no*

*Si non, le participant refuse → stopper l'entretien*  
*If no, the participant refuses → end the interview*

Age :/ *Age*: .....

Sexe :/ *Sex*:  Homme/Garçon / *Male*  Femme/Fille / *Female*

Poids (en kg) :/ *Weight*: .....

Taille (en cm) :/ *Height*: .....

Antécédents médicaux :/ *Medical history*:

- |                                                                                 |                                                                               |
|---------------------------------------------------------------------------------|-------------------------------------------------------------------------------|
| <input type="checkbox"/> Aucun                                                  | <input type="checkbox"/> None                                                 |
| <input type="checkbox"/> grossesse en cours                                     | <input type="checkbox"/> Current pregnancy                                    |
| <input type="checkbox"/> Asthme /                                               | <input type="checkbox"/> Asthma                                               |
| <input type="checkbox"/> Autres maladies respiratoires (bronchite chronique...) | <input type="checkbox"/> Other respiratory diseases                           |
| <input type="checkbox"/> Hypertension                                           | <input type="checkbox"/> Hypertension                                         |
| <input type="checkbox"/> maladie cardiaque (angine de poitrine, infarctus)      | <input type="checkbox"/> Heart disease                                        |
| <input type="checkbox"/> diabète traité                                         | <input type="checkbox"/> Treated diabetes                                     |
| <input type="checkbox"/> Cancer en cours de traitement (sauf hormonothérapie)   | <input type="checkbox"/> Being treated for cancer (excluding hormone therapy) |
| <input type="checkbox"/> VIH et autres troubles de l'immunité                   | <input type="checkbox"/> HIV and other immune disorders                       |
| <input type="checkbox"/> maladies chroniques du foie                            | <input type="checkbox"/> Chronic liver disease                                |
| <input type="checkbox"/> maladies rénales chroniques                            | <input type="checkbox"/> Chronic kidney disease                               |
| <input type="checkbox"/> autre ALD, précisez : .....                            | <input type="checkbox"/> Other chronic disease: .....                         |

Depuis le 24 février (à la fin des vacances scolaires d'hiver/semaine du Mardi Gras), avez-vous eu des symptômes que vous n'avez pas habituellement et qui ont duré au moins 3 jours ? / *Since the 24<sup>th</sup> February (at the end of the winter school holidays/Mardi Gras week), have you had any symptoms that you don't usually have and that lasted at least 3 days?*

oui / *yes*  non / *no*

**Si oui / *If yes*:**

Quels symptôme(s) avez-vous eu ? / *What symptom(s) have you had?*

- Fièvre ou sensation de fièvre  *Fever or feeling feverish*  
 Mal à tête  *Headache*

- |                                                                              |                                                                            |
|------------------------------------------------------------------------------|----------------------------------------------------------------------------|
| <input type="checkbox"/> Fatigue inhabituelle                                | <input type="checkbox"/> Unusual fatigue                                   |
| <input type="checkbox"/> Courbatures / douleurs musculaires                  | <input type="checkbox"/> Body aches, muscle pain                           |
| <input type="checkbox"/> Toux                                                | <input type="checkbox"/> Cough                                             |
| <input type="checkbox"/> Difficultés respiratoires, essoufflement inhabituel | <input type="checkbox"/> Difficulty breathing, unusual shortness of breath |
| <input type="checkbox"/> Nez qui coule                                       | <input type="checkbox"/> Runny nose                                        |
| <input type="checkbox"/> Troubles du goût/de l'odorat                        | <input type="checkbox"/> Taste/smell disorders                             |
| <input type="checkbox"/> Nausées/vomissements                                | <input type="checkbox"/> Nausea, vomiting                                  |
| <input type="checkbox"/> Diarrhée                                            | <input type="checkbox"/> Diarrhoea                                         |
| <input type="checkbox"/> Douleurs thoraciques, oppression                    | <input type="checkbox"/> Chest pain, oppression                            |
| <input type="checkbox"/> Si ≥80 ans : Confusion, chutes répétées             | <input type="checkbox"/> If ≥80 years: Confusion, repeated falls           |

Quand ont commencé ces symptômes ? (si plusieurs périodes : prendre les symptômes les plus proches du Covid-19 ou si impossible de différencier prendre la 1<sup>ère</sup> période) / When did these symptoms start? (if more than one period: record the time when the symptoms which most closely resemble those of Covid-19 started, or if it is impossible to differentiate between periods, take the first period)

- avant confinement (17/03) / Before the lockdown (17/03)
- Pendant confinement (17/03) et avant 1 mai / During the lockdown (17/03) and before the 1<sup>st</sup> of May
- après le 1<sup>er</sup> mai / After the 1<sup>st</sup> of May

[ Si après le 1<sup>er</sup> mai : Avez-vous eu des signes au cours des 15 derniers jours ? / If after the 1<sup>st</sup> of May: have you had any symptoms in the last fortnight?

- oui / yes  non / no

Ces symptômes vous ont-ils fait penser que vous aviez peut-être le coronavirus ? / Did these symptoms lead you think that you might have COVID-19?

- Non / No  oui peut-être / Yes, maybe  oui sûrement / Yes, definitely

Avez-vous consulté un professionnel de santé pour ces symptômes ? / Did you consult a health professional for these symptoms?

- oui / yes  non / no

[ Si oui : qui avez-vous consulté ? / If yes: Who did you consult?

- Médecin traitant / General practitioner
- Centre covid / Covid centre
- Hôpital, urgence (sans hospitalisation) / Hospital, emergency department (without hospitalisation)
- Autre, précisez : / other, specify: .....

Avez-vous été hospitalisé en raison de ces symptômes ? / Were you hospitalized because of these symptoms?

- oui / yes  non / no

[ Si oui : combien de temps avez-vous été hospitalisé (en nombre de jours) ? / If yes: how long were you hospitalised (number of days)? : ....

Avez-vous été hospitalisé en service de réanimation ? / Were you hospitalised in an intensive care unit?

- oui / yes  non / no

Avez-vous eu ... ? / *Did you have a ... ?*

Test PCR (coton-tige) / *PCR test (swab/cotton bud)*

Si oui / *If yes* :  positif / *positive*  négatif / *negative*  Ne sait pas / *Don't know*

Sérologie (prise de sang) / *Serology test (blood sample)*

Si oui / *If yes* :  positif / *positive*  négatif / *negative*  Ne sait pas / *Don't know*

Scanner thoracique / *Chest CT scan*

Si oui : / *If yes*:  évocateur du Covid-19 / *suggestive*  non évocateur / *not suggestive*

Ne sait pas / *Don't know*

A votre connaissance depuis le 24 février, avez-vous été en contact avec une ou plusieurs personnes malades (toux ou fièvre ou test positif ou consultation pour une suspicion de coronavirus) à l'extérieur de votre logement ? / *To your knowledge, since the 24<sup>th</sup> February, have you been in contact with one or more sick people (cough or fever or positive test or consultation because of suspected COVID-19) outside your home?*

oui / *yes*  non / *no*  Ne sait pas / *Don't know*

#### Logement : / *Housing*:

En ce moment, combien de personnes habitent dans le logement où vous vivez actuellement (y compris vous-même) ? / *How many people live in your current home (including you)?* .....

Nous allons maintenant parlé du logement principal dans lequel vous viviez pendant les 2 mois du confinement. (si plusieurs endroits, prendre la plus longue durée)

*We are now going to talk about the main accommodation where you lived during the two months of lockdown (if more than one place, take the place where respondent lived longest)*

Est-ce le logement dans lequel vous habitez actuellement ? / *Is that your current home?*

oui / *yes*  non / *no*

Si le participant répond non : Vous avez passé la majorité de votre confinement dans un logement différent de votre logement actuel. Ce logement était-il dans le quartier :

*If the respondent replies 'no': You spent the majority of the lockdown in a home other than your current home. In which neighbourhood was that accommodation located?*

St Jacques

Nouveau logis

Haut-Vernet

Aucun de ces trois quartiers / *None of these three neighbourhoods*

Ce logement était : / *This accommodation is/was:*

Un appartement / *An apartment*

Une maison / *A house*

Autre, précisez : .... / *Other, specify:.....*

Combien de pièces comportaient ce logement (hors salle de bain, toilettes, cuisine) ? / *How many rooms are/were in the accommodation (excluding bathroom, toilet and kitchen)?* : ....

Avait-t-il un espace extérieur privé (jardin, terrasse, balcon) ? / *Is/Was there a private outdoor space (garden, patio, balcony)?*

oui / *yes*    non / *no*

Pendant le confinement, combien de personnes habitaient dans ce logement (y compris vous-même) ? / *During the lockdown, how many people lived in the household (including you)?* .....

Dont combien d'enfants de moins de 12 ans : / *Including children under 12 years:* ...

Dont combien d'enfants de 12 à 17 ans : / *Including children aged 12-17 years:* ...

Dont combien d'adultes de 18 ans et plus : / *Including adults aged 18 years and over:* ...

Depuis le 24 février, combien de personnes vivant dans ce logement (autre que vous) ont été malades (toux ou fièvre ou test positif ou consultation pour une suspicion de coronavirus) ? / *From the 24<sup>th</sup> of February to the end of lockdown, how many people living in this household (excluding you) have been ill (cough, fever, positive test or consultation for suspected COVID-19)?* : ...

#### Information et comportements face au Covid-19 / *Information and behaviour in the face of Covid-19*

Etes-vous sorti pendant le confinement pour le travail ? / *During the lockdown, did you go out for work?*

jamais / *never*    moins d'1 fois/semaine / *less than once a week*

1fois/semaine / *once a week*    tous les jours ou presque / *every day or almost every day*

Etes-vous sorti pendant le confinement pour les courses ? / *During the lockdown, did you go out to do the grocery shopping?*

jamais / *never*    moins d'1 fois/semaine / *less than once a week*

1fois/semaine / *once a week*    tous les jours ou presque / *every day or almost every day*

Etes-vous sorti pendant le confinement pour visiter la famille/des proches ? / *During the lockdown, did you go out to visit family/friends?*

jamais / *never*    moins d'1 fois/semaine / *less than once a week*

1fois/semaine / *once a week*    tous les jours ou presque / *every day or almost every day*

Etes-vous sorti pendant le confinement pour faire du sport/se promener ? / *During the lockdown, did you go out to play sports/for a walk?*

jamais / *never*    moins d'1 fois/semaine / *less than once a week*

1fois/semaine / *once a week*    tous les jours ou presque / *every day or almost every day*

Etes-vous sorti pendant le confinement pour une cérémonie ? / *During the lockdown, did you go out for a ceremony?*

jamais / *never*    1 fois / *once*    plusieurs fois / *several times*

Etes-vous sorti pendant le confinement pour une autre raison ? / *During the lockdown, did you go out for another reason?* :  oui, précisez : / *yes, specify:* .....

jamais / *never*    moins d'1 fois/semaine / *less than once a week*

1fois/semaine / *once a week*    tous les jours ou presque / *every day or almost every day*

Est-ce que des personnes qui n'habitaient pas dans votre logement sont venues chez vous pendant le confinement ? (Par exemple pour amener à manger ou pour des soins)

*Did people, other than people who live in the same housing as you, come to your home during the lockdown? (For example, to bring food or provide care or assistance)*

jamais / *never*    moins d'1 fois/semaine / *less than once a week*

1fois/semaine / *once a week*    tous les jours ou presque / *every day or almost every day*

1  
2  
3 Sur une échelle de 0 à 10, avez-vous eu des informations sur ce qu'il fallait faire pour se protéger et  
4 protéger les autres : lavage des mains, confinement, respect des distances avec d'autres personnes,  
5 port du masque ? (0=aucune information → 10 = informations complètes)

6 *On a scale from 0 to 10, how much information did you have on what to do to protect yourself and others:*  
7 *hand washing, self-isolation, social distancing, wearing a mask? (0 = no information → 10 = a great deal*  
8 *of information)*  
9

10  
11 0 | \_\_\_\_\_ | 10  
12

13 Avez-vous pu rester à plus d'un mètre des personnes que vous avez rencontrées à l'extérieure de votre  
14 logement pendant le confinement (par exemple : pour discuter ou dans des files d'attente) ? / *Were you*  
15 *able to stay more than one metre away from people you met outside your home during the lockdown ?*

16  toujours / *always*  souvent / *often*  rarement / *rarely*  jamais / *never*  
17

18 Vous êtes-vous lavé plus souvent les mains pendant le confinement ? / *Did you wash your hands more*  
19 *often during the lockdown?*

20  non, pas plus souvent / *no, not more often*

21  un peu plus souvent / *a little more often*

22  beaucoup plus souvent / *much more often*

23  Ne sait pas / *Don't know*  
24  
25  
26

27 Sur une échelle de 0 à 10, pensez-vous vous être protégé du virus ? (0=pas du tout → 10 =  
28 complètement)

29 *N.B. : si demande de précision : par exemple par votre respect des gestes barrières ou par le*  
30 *confinement*

31 *On a scale from 0 to 10, do you think you protected yourself against the virus? (0 = not at all → 10 =*  
32 *completely)*

33 *N.B.: if the respondent requests clarification: for example, thanks to you respecting the preventive*  
34 *measures or self-isolating*  
35

36  
37 0 | \_\_\_\_\_ | 10  
38  
39

40 Si une épidémie de même nature survenait, quelle serait selon vous la mesure la plus efficace à mettre  
41 en place pour vous protéger vous et vos proches ? *In your opinion, if an epidemic of the same nature*  
42 *occurred in the future, what would be the most effective measure to take?*  
43  
44 .....  
45 .....

Supplementary table S1: Demographic and behavioural characteristics (weighted) by neighbourhood

|                                                                    | All<br>(n=700) | Neighbourhood A<br>(n=312) | Neighbourhood B<br>(n=173) | Neighbourhood C<br>(n=215) |
|--------------------------------------------------------------------|----------------|----------------------------|----------------------------|----------------------------|
| Characteristics                                                    | Col%           | Col%                       | Col%                       | Col%                       |
| <b>Sex</b>                                                         |                |                            |                            |                            |
| Male                                                               | 49.6           | 50.8                       | 49.3                       | 43.3                       |
| Female                                                             | 50.4           | 49.2                       | 50.7                       | 56.7                       |
| <b>Age (years)</b>                                                 |                |                            |                            |                            |
| 6-14                                                               | 18.7           | 22.0                       | 12.4                       | 13.5                       |
| 15-19                                                              | 15.6           | 15.9                       | 15.3                       | 14.8                       |
| 20-64                                                              | 37.3           | 39.6                       | 27.3                       | 45.9                       |
| ≥ 65                                                               | 16.4           | 11.7                       | 27.0                       | 20.1                       |
| <b>Obesity <sup>1</sup></b>                                        |                |                            |                            |                            |
| No                                                                 | 59.3           | 56.1                       | 71.3                       | 51.4                       |
| Yes                                                                | 40.7           | 43.9                       | 28.7                       | 48.6                       |
| <b>Other medical conditions <sup>2</sup></b>                       |                |                            |                            |                            |
| No                                                                 | 70.7           | 72.7                       | 66.6                       | 67.7                       |
| Yes: one                                                           | 17.8           | 16.2                       | 21.1                       | 20.0                       |
| Yes: several                                                       | 11.5           | 11.1                       | 12.4                       | 12.3                       |
| <b>Clinical COVID-19 cases in the household <sup>3</sup></b>       |                |                            |                            |                            |
| No                                                                 | 50.1           | 38.9                       | 69.2                       | 72.5                       |
| 1 person                                                           | 25.3           | 28.3                       | 20.8                       | 17.7                       |
| >1 person                                                          | 24.6           | 32.8                       | 10.1                       | 9.8                        |
| <b>Housing type</b>                                                |                |                            |                            |                            |
| Apartment                                                          | 52.0           | 71.5                       | 17.5                       | 15.1                       |
| House                                                              | 45.8           | 28.5                       | 73.9                       | 83.9                       |
| Other                                                              | 2.2            | 0.0                        | 8.6                        | 1.1                        |
| <b>Presence of a private outdoor space</b>                         |                |                            |                            |                            |
| No                                                                 | 47.9           | 72.2                       | 1.5                        | 9.6                        |
| Yes                                                                | 52.1           | 27.8                       | 98.5                       | 90.4                       |
| <b>Number of rooms</b>                                             |                |                            |                            |                            |
| 1-2 rooms                                                          | 18.4           | 21.0                       | 10.9                       | 19.6                       |
| 3 rooms                                                            | 31.1           | 38.4                       | 18.9                       | 16.5                       |
| ≥ 4 rooms                                                          | 50.5           | 40.7                       | 70.2                       | 63.9                       |
| <b>Number of people per room (except living room) <sup>4</sup></b> |                |                            |                            |                            |
| > 1 person                                                         | 71.1           | 75.3                       | 55.5                       | 80.5                       |
| 1 person                                                           | 16.7           | 16.2                       | 19.7                       | 13.1                       |
| < 1 person                                                         | 12.3           | 8.5                        | 24.9                       | 6.4                        |
| <b>At least one child in the household</b>                         |                |                            |                            |                            |
| No                                                                 | 35.3           | 32.2                       | 49.5                       | 22.7                       |
| Yes                                                                | 64.7           | 67.8                       | 50.5                       | 77.4                       |

|                                                | All<br>(n=700) | Neighbourhood A<br>(n=312) | Neighbourhood B<br>(n=173) | Neighbourhood C<br>(n=215) |
|------------------------------------------------|----------------|----------------------------|----------------------------|----------------------------|
| Characteristics                                | Col%           | Col%                       | Col%                       | Col%                       |
| <b>Went out for work during the lockdown</b>   |                |                            |                            |                            |
| No                                             | 96.4           | 97.4                       | 93.6                       | 97.1                       |
| Yes                                            | 3.6            | 2.6                        | 6.4                        | 2.9                        |
| <b>Went out for a walk during the lockdown</b> |                |                            |                            |                            |
| Never                                          | 81.2           | 81.9                       | 84.3                       | 70.9                       |
| Sometimes ( $\leq 1$ time a week)              | 7.4            | 6.7                        | 9.6                        | 6.6                        |
| Almost every day                               | 11.4           | 11.4                       | 6.1                        | 22.5                       |

Percentages were weighted by sampling and post-stratification weights.

<sup>1</sup> For those aged 18 years or older: BMI $\geq 30$ kg/m<sup>2</sup>; for those aged 6-17 years: BMI $\geq$ IOTF-30 cut-off points

<sup>2</sup> Other medical conditions including: Asthma, other respiratory diseases, hypertension, heart disease, treated diabetes, treated cancer (excluding hormone therapy), HIV and immunodeficiency, chronic liver disease, chronic kidney disease, neuromuscular diseases

<sup>3</sup> Clinical COVID-19 cases in the household: Number of people, except the respondent, with clinical signs of covid-19 (cough, fever), a positive RT-PCR test or who were consulted for suspected covid-19 since 24 February 2020

<sup>4</sup> Living rooms were excluded, except for single people, in order to measure the potential for isolation in the dwellings. Indicator calculated: ([number of people] / number of rooms -1).



STROBE Statement—Checklist of items that should be included in reports of *cross-sectional studies*

|                              | Item No | Recommendation                                                                                                                                                                                    | Page No                   |
|------------------------------|---------|---------------------------------------------------------------------------------------------------------------------------------------------------------------------------------------------------|---------------------------|
| <b>Title and abstract</b>    | 1       | (a) Indicate the study's design with a commonly used term in the title or the abstract                                                                                                            | 1                         |
|                              |         | (b) Provide in the abstract an informative and balanced summary of what was done and what was found                                                                                               | 2                         |
| <b>Introduction</b>          |         |                                                                                                                                                                                                   |                           |
| Background/rationale         | 2       | Explain the scientific background and rationale for the investigation being reported                                                                                                              | 4                         |
| Objectives                   | 3       | State specific objectives, including any prespecified hypotheses                                                                                                                                  | 5                         |
| <b>Methods</b>               |         |                                                                                                                                                                                                   |                           |
| Study design                 | 4       | Present key elements of study design early in the paper                                                                                                                                           | 5                         |
| Setting                      | 5       | Describe the setting, locations, and relevant dates, including periods of recruitment, exposure, follow-up, and data collection                                                                   | 5                         |
| Participants                 | 6       | (a) Give the eligibility criteria, and the sources and methods of selection of participants                                                                                                       | 5                         |
| Variables                    | 7       | Clearly define all outcomes, exposures, predictors, potential confounders, and effect modifiers. Give diagnostic criteria, if applicable                                                          | 5-7                       |
| Data sources/<br>measurement | 8*      | For each variable of interest, give sources of data and details of methods of assessment (measurement). Describe comparability of assessment methods if there is more than one group              | 6                         |
| Bias                         | 9       | Describe any efforts to address potential sources of bias                                                                                                                                         | 6 + 14<br>(discussion)    |
| Study size                   | 10      | Explain how the study size was arrived at                                                                                                                                                         | Supplemental<br>materials |
| Quantitative variables       | 11      | Explain how quantitative variables were handled in the analyses. If applicable, describe which groupings were chosen and why                                                                      | 6                         |
| Statistical methods          | 12      | (a) Describe all statistical methods, including those used to control for confounding                                                                                                             | 6-7                       |
|                              |         | (b) Describe any methods used to examine subgroups and interactions                                                                                                                               | 7                         |
|                              |         | (c) Explain how missing data were addressed                                                                                                                                                       | NA                        |
|                              |         | (d) If applicable, describe analytical methods taking account of sampling strategy                                                                                                                | 6-7                       |
|                              |         | (e) Describe any sensitivity analyses                                                                                                                                                             | NA                        |
| <b>Results</b>               |         |                                                                                                                                                                                                   |                           |
| Participants                 | 13*     | (a) Report numbers of individuals at each stage of study—eg numbers potentially eligible, examined for eligibility, confirmed eligible, included in the study, completing follow-up, and analysed | 7                         |
|                              |         | (b) Give reasons for non-participation at each stage                                                                                                                                              | 15 (discussion)           |
|                              |         | (c) Consider use of a flow diagram                                                                                                                                                                | Figure 2                  |
| Descriptive data             | 14*     | (a) Give characteristics of study participants (eg demographic, clinical, social) and information on exposures and potential confounders                                                          | 7-8                       |



|                          |     |                                                                                                                                                                                                              |                            |
|--------------------------|-----|--------------------------------------------------------------------------------------------------------------------------------------------------------------------------------------------------------------|----------------------------|
|                          |     | (b) Indicate number of participants with missing data for each variable of interest                                                                                                                          | 7 and figure 2             |
| Outcome data             | 15* | Report numbers of outcome events or summary measures                                                                                                                                                         | 8                          |
| Main results             | 16  | (a) Give unadjusted estimates and, if applicable, confounder-adjusted estimates and their precision (eg, 95% confidence interval). Make clear which confounders were adjusted for and why they were included | 8-12 (table 1 and table 2) |
|                          |     | (b) Report category boundaries when continuous variables were categorized                                                                                                                                    | Table 1                    |
|                          |     | (c) If relevant, consider translating estimates of relative risk into absolute risk for a meaningful time period                                                                                             | NA                         |
| Other analyses           | 17  | Report other analyses done—eg analyses of subgroups and interactions, and sensitivity analyses                                                                                                               | NA                         |
| <b>Discussion</b>        |     |                                                                                                                                                                                                              |                            |
| Key results              | 18  | Summarise key results with reference to study objectives                                                                                                                                                     | 13-14                      |
| Limitations              | 19  | Discuss limitations of the study, taking into account sources of potential bias or imprecision. Discuss both direction and magnitude of any potential bias                                                   | 14-15                      |
| Interpretation           | 20  | Give a cautious overall interpretation of results considering objectives, limitations, multiplicity of analyses, results from similar studies, and other relevant evidence                                   | 13-14 15                   |
| Generalisability         | 21  | Discuss the generalisability (external validity) of the study results                                                                                                                                        | 14-15                      |
| <b>Other information</b> |     |                                                                                                                                                                                                              |                            |
| Funding                  | 22  | Give the source of funding and the role of the funders for the present study and, if applicable, for the original study on which the present article is based                                                | 16                         |

\*Give information separately for exposed and unexposed groups.

**Note:** An Explanation and Elaboration article discusses each checklist item and gives methodological background and published examples of transparent reporting. The STROBE checklist is best used in conjunction with this article (freely available on the Web sites of PLoS Medicine at <http://www.plosmedicine.org/>, Annals of Internal Medicine at <http://www.annals.org/>, and Epidemiology at <http://www.epidem.com/>). Information on the STROBE Initiative is available at [www.strobe-statement.org](http://www.strobe-statement.org).
