# Supplementary material for: Seroprevalence of anti-SARS-CoV-2 antibodies after the first wave of the COVID-19 pandemic in a vulnerable population in France: a cross-sectional study
Source: PubMed Central journal article supplement — BMJ Open. 2021 Nov 23;11(11):e053201. doi: 10.1136/bmjopen-2021-053201 (PMC8611237; doi:10.1136/bmjopen-2021-053201), 2021-11-23
Supplement: bmjopen-2021-053201supp002.pdf [file bmjopen-2021-053201supp002.pdf]

Supplementary table S1: Demographic and behavioural characteristics (weighted) by neighbourhood

|                                                                    | All<br>(n=700) | Neighbourhood A<br>(n=312) | Neighbourhood B<br>(n=173) | Neighbourhood C<br>(n=215) |
|--------------------------------------------------------------------|----------------|----------------------------|----------------------------|----------------------------|
| Characteristics                                                    | Col%           | Col%                       | Col%                       | Col%                       |
| <b>Sex</b>                                                         |                |                            |                            |                            |
| Male                                                               | 49.6           | 50.8                       | 49.3                       | 43.3                       |
| Female                                                             | 50.4           | 49.2                       | 50.7                       | 56.7                       |
| <b>Age (years)</b>                                                 |                |                            |                            |                            |
| 6-14                                                               | 18.7           | 22.0                       | 12.4                       | 13.5                       |
| 15-19                                                              | 15.6           | 15.9                       | 15.3                       | 14.8                       |
| 20-64                                                              | 37.3           | 39.6                       | 27.3                       | 45.9                       |
| ≥ 65                                                               | 16.4           | 11.7                       | 27.0                       | 20.1                       |
| <b>Obesity <sup>1</sup></b>                                        |                |                            |                            |                            |
| No                                                                 | 59.3           | 56.1                       | 71.3                       | 51.4                       |
| Yes                                                                | 40.7           | 43.9                       | 28.7                       | 48.6                       |
| <b>Other medical conditions <sup>2</sup></b>                       |                |                            |                            |                            |
| No                                                                 | 70.7           | 72.7                       | 66.6                       | 67.7                       |
| Yes: one                                                           | 17.8           | 16.2                       | 21.1                       | 20.0                       |
| Yes: several                                                       | 11.5           | 11.1                       | 12.4                       | 12.3                       |
| <b>Clinical COVID-19 cases in the household <sup>3</sup></b>       |                |                            |                            |                            |
| No                                                                 | 50.1           | 38.9                       | 69.2                       | 72.5                       |
| 1 person                                                           | 25.3           | 28.3                       | 20.8                       | 17.7                       |
| >1 person                                                          | 24.6           | 32.8                       | 10.1                       | 9.8                        |
| <b>Housing type</b>                                                |                |                            |                            |                            |
| Apartment                                                          | 52.0           | 71.5                       | 17.5                       | 15.1                       |
| House                                                              | 45.8           | 28.5                       | 73.9                       | 83.9                       |
| Other                                                              | 2.2            | 0.0                        | 8.6                        | 1.1                        |
| <b>Presence of a private outdoor space</b>                         |                |                            |                            |                            |
| No                                                                 | 47.9           | 72.2                       | 1.5                        | 9.6                        |
| Yes                                                                | 52.1           | 27.8                       | 98.5                       | 90.4                       |
| <b>Number of rooms</b>                                             |                |                            |                            |                            |
| 1-2 rooms                                                          | 18.4           | 21.0                       | 10.9                       | 19.6                       |
| 3 rooms                                                            | 31.1           | 38.4                       | 18.9                       | 16.5                       |
| ≥ 4 rooms                                                          | 50.5           | 40.7                       | 70.2                       | 63.9                       |
| <b>Number of people per room (except living room) <sup>4</sup></b> |                |                            |                            |                            |
| > 1 person                                                         | 71.1           | 75.3                       | 55.5                       | 80.5                       |
| 1 person                                                           | 16.7           | 16.2                       | 19.7                       | 13.1                       |
| < 1 person                                                         | 12.3           | 8.5                        | 24.9                       | 6.4                        |
| <b>At least one child in the household</b>                         |                |                            |                            |                            |
| No                                                                 | 35.3           | 32.2                       | 49.5                       | 22.7                       |
| Yes                                                                | 64.7           | 67.8                       | 50.5                       | 77.4                       |

|                                                | All<br>(n=700) | Neighbourhood A<br>(n=312) | Neighbourhood B<br>(n=173) | Neighbourhood C<br>(n=215) |
|------------------------------------------------|----------------|----------------------------|----------------------------|----------------------------|
| Characteristics                                | Col%           | Col%                       | Col%                       | Col%                       |
| <b>Went out for work during the lockdown</b>   |                |                            |                            |                            |
| No                                             | 96.4           | 97.4                       | 93.6                       | 97.1                       |
| Yes                                            | 3.6            | 2.6                        | 6.4                        | 2.9                        |
| <b>Went out for a walk during the lockdown</b> |                |                            |                            |                            |
| Never                                          | 81.2           | 81.9                       | 84.3                       | 70.9                       |
| Sometimes ( $\leq 1$ time a week)              | 7.4            | 6.7                        | 9.6                        | 6.6                        |
| Almost every day                               | 11.4           | 11.4                       | 6.1                        | 22.5                       |

Percentages were weighted by sampling and post-stratification weights.

<sup>1</sup> For those aged 18 years or older: BMI $\geq$ 30kg/m<sup>2</sup>; for those aged 6-17 years: BMI $\geq$ IOTF-30 cut-off points

<sup>2</sup> Other medical conditions including: Asthma, other respiratory diseases, hypertension, heart disease, treated diabetes, treated cancer (excluding hormone therapy), HIV and immunodeficiency, chronic liver disease, chronic kidney disease, neuromuscular diseases

<sup>3</sup> Clinical COVID-19 cases in the household: Number of people, except the respondent, with clinical signs of covid-19 (cough, fever), a positive RT-PCR test or who were consulted for suspected covid-19 since 24 February 2020

<sup>4</sup> Living rooms were excluded, except for single people, in order to measure the potential for isolation in the dwellings. Indicator calculated: ((number of people) / number of rooms -1)).
